# Supplementary material for: Theoretical insight into the C–H and C–C scission mechanism of ethane on a tetrahedral Pt4subnanocluster
Source: Royal Society of Chemistry journal article supplement (doi:10.1039/c5ra06550j), 2015-01-01

## Supporting Information for

# Theoretical Insight into C-H and C-C Scission Mechanism of Ethane on Tetrahedral Pt<sub>4</sub> Subnanocluster

Hong-Quan Fu<sup>a</sup>, Ben-Fang Su<sup>a</sup>, Hua-Qing Yang <sup>\*a</sup>, Chang-Wei Hu<sup>b</sup>

*Received (in XXX, XXX) Xth XXXXXXXXXX 20XX, Accepted Xth XXXXXXXXXX 20XX*

<sup>a</sup> *College of Chemical Engineering, Sichuan University, Chengdu, Sichuan, 610065, P.R. China*

<sup>b</sup> *Key Laboratory of Green Chemistry and Technology, Ministry of Education, College of Chemistry, Sichuan University, Chengdu, Sichuan, 610064, P.R. China*

*\*Correspondence to: H.-Q. Yang; e-mail: [huaqingyang@scu.edu.cn](mailto:huaqingyang@scu.edu.cn)*

***RSC Advances***

Fax: 86 028-85415608

Telephone: 86 028-85415608

|                                                                                                                                                                                                                                                                                                                                                                                                                                                                                                |     |
|------------------------------------------------------------------------------------------------------------------------------------------------------------------------------------------------------------------------------------------------------------------------------------------------------------------------------------------------------------------------------------------------------------------------------------------------------------------------------------------------|-----|
| <b>Table S1:</b> Zero-point energies (ZPE) (hartree), total energies ( $E_c$ ) (hartree) corrected by ZPE, and relative energies ( $E_r$ ) ( $\text{kJ mol}^{-1}$ ) various species with respect to the reactants [ $\text{Pt}_4 + \text{C}_2\text{H}_6$ ] in the C-H bond activation of $\text{C}_2\text{H}_6$ by $\text{Pt}_4$ cluster calculated at the BPW91/Lanl2tz, 6-311++G(d, p) and BPW91/Lanl2tz, aug-cc-pvtz//BPW91/Lanl2tz, 6-311++G(d, p) levels of theory .....                  | 3   |
| <b>Table S2:</b> Zero-point energies (ZPE) (hartree), total energies ( $E_c$ ) (hartree) corrected by ZPE, and relative energies ( $E_r$ ) ( $\text{kJ mol}^{-1}$ ) of various species plus $\text{H}_2$ with respect to the reactants [ $\text{Pt}_4 + \text{C}_2\text{H}_4$ ] in the C-H activation of $\text{C}_2\text{H}_4$ by $\text{Pt}_4$ clusters calculated at the BPW91/Lanl2tz, 6-311++G(d, p) and BPW91/Lanl2tz, aug-cc-pvtz//BPW91/Lanl2tz, 6-311++G(d, p) levels of theory ..... | 5   |
| <b>Table S3:</b> Zero-point energies (ZPE) (hartree), total energies ( $E_c$ ) (hartree) corrected by ZPE, and relative energies ( $E_r$ ) ( $\text{kJ mol}^{-1}$ ) various species with respect to the reactants [ $\text{Pt}_4 + \text{C}_2\text{H}_6$ ] in the C-C bond activation of $\text{C}_2\text{H}_6$ by $\text{Pt}_4$ cluster calculated at the BPW91/Lanl2tz, 6-311++G(d, p) and BPW91/Lanl2tz, aug-cc-pvtz//BPW91/Lanl2tz, 6-311++G(d, p) levels of theory .....                  | 7   |
| <b>Table S4:</b> Snapshot and standard orientation of all the species in the gas phase calculated at the BPW91/6-311++G(d, p), Lanl2tz level. Distance lengths are reported in Å .....                                                                                                                                                                                                                                                                                                         | 8   |
| <b>Table S5:</b> IRC analysis of 2-TS3, 2-TS7, 3-TS6 and 3-TS11 for the minimum energy crossing points(MECPs).....                                                                                                                                                                                                                                                                                                                                                                             | P34 |

**Table S1:** Zero-point energies (ZPE) (hartree), total energies ( $E_c$ ) (hartree) corrected by ZPE, and relative energies ( $E_r$ ) (kJ mol<sup>-1</sup>) various species with respect to the reactants [Pt<sub>4</sub> + C<sub>2</sub>H<sub>6</sub>] in the C-H bond activation of C<sub>2</sub>H<sub>6</sub> by Pt<sub>4</sub> cluster calculated at the BPW91/Lanl2tz, 6-311++G(d, p) and BPW91/Lanl2tz, aug-cc-pvtz//BPW91/Lanl2tz, 6-311++G(d, p) levels of theory.

| Species                                                     | BPW91/Lanl2tz, 6-311++G(d, p) |             |        | BPW91/Lanl2tz, aug-cc-pvtz//<br>BPW91/Lanl2tz, 6-311++G(d, p) |        |
|-------------------------------------------------------------|-------------------------------|-------------|--------|---------------------------------------------------------------|--------|
|                                                             | ZPE                           | $E_c$       | $E_r$  | $E_c$                                                         | $E_r$  |
| <sup>3</sup> Pt <sub>4</sub> +C <sub>2</sub> H <sub>6</sub> | 0.07450                       | -556.67429  | 0.0    | -556.68168                                                    | 0.0    |
| <sup>3</sup> 1-IM1                                          | 0.07350                       | -556.69145  | -45.0  | -556.70552                                                    | -62.6  |
| <sup>3</sup> 1-TS1                                          | 0.07098                       | -556.69046  | -42.4  | -556.70441                                                    | -59.7  |
| <sup>3</sup> 1-IM2                                          | 0.07243                       | -556.71522  | -107.5 | -556.73164                                                    | -131.2 |
| <sup>3</sup> 1-TS2                                          | 0.07022                       | -556.70613  | -83.6  | -556.72032                                                    | -101.4 |
| <sup>3</sup> 1-IM3                                          | 0.07006                       | -556.72495  | -133.0 | -556.74491                                                    | -166.0 |
| <sup>3</sup> 1-TS3                                          | 0.06823                       | -556.72537  | -134.1 | -556.74553                                                    | -167.6 |
| <sup>3</sup> 1-IM4                                          | 0.06942                       | -556.74043  | -173.7 | -556.76006                                                    | -205.8 |
| <sup>3</sup> 1-TS4                                          | 0.06758                       | -556.73930  | -170.7 | -556.75938                                                    | -204.0 |
| <sup>3</sup> 1-IM5                                          | 0.06848                       | -556.74503  | -185.7 | -556.76508                                                    | -219.0 |
| <sup>3</sup> 1-TS5                                          | 0.06721                       | -556.69705  | -59.8  | -556.71795                                                    | -95.2  |
| <sup>3</sup> 1-IM8                                          | 0.06860                       | -556.73354  | -155.6 | -556.75363                                                    | -188.9 |
| <sup>3</sup> 1-TS6                                          | 0.06557                       | -556.71282  | -101.2 | -556.73342                                                    | -135.9 |
| <sup>3</sup> 1-IM9                                          | 0.06771                       | -556.73186  | -151.1 | -556.75266                                                    | -186.4 |
| <sup>3</sup> 1-IM6+H <sub>2</sub>                           | 0.06371                       | -556.70116  | -70.5  | -556.71584                                                    | -89.7  |
| <sup>3</sup> 1-IM7+C <sub>2</sub> H <sub>4</sub>            | 0.06583                       | -556.67501  | -1.9   | -556.68875                                                    | -18.6  |
| <sup>3</sup> 1-IM10+H <sub>2</sub>                          | 0.06333                       | -556.68088  | -17.3  | -556.69473                                                    | -34.3  |
| <sup>1</sup> Pt <sub>4</sub> +C <sub>2</sub> H <sub>6</sub> | 0.07444                       | -556.65593  | 48.2   | -556.66333                                                    | 48.2   |
| <sup>1</sup> 1-IM1                                          | 0.07354                       | -556.674791 | -1.3   | -556.68435                                                    | -7.0   |
| <sup>1</sup> 1-TS1                                          | 0.07074                       | -556.673711 | 1.5    | -556.67778                                                    | 10.2   |
| <sup>1</sup> 1-IM2                                          | 0.072321                      | -556.69582  | -56.5  | -556.79589                                                    | -110.0 |
| <sup>1</sup> 1-TS2                                          | 0.06998                       | -556.68877  | -38.0  | -556.70296                                                    | -55.9  |
| <sup>1</sup> 1-IM3                                          | 0.07002                       | -556.71630  | -110.3 | -556.80590                                                    | -142.3 |
| <sup>1</sup> 1-TS3                                          | 0.06822                       | -556.71758  | -113.6 | -556.80573                                                    | -146.6 |
| <sup>1</sup> 1-IM4                                          | 0.06956                       | -556.73985  | -172.1 | -556.75897                                                    | -202.9 |
| <sup>1</sup> 1-TS4                                          | 0.06740                       | -556.73456  | -158.2 | -556.82135                                                    | -189.7 |
| <sup>1</sup> 1-IM5                                          | 0.06858                       | -556.74370  | -182.2 | -556.83230                                                    | -215.4 |
| <sup>1</sup> 1-TS5                                          | 0.06720                       | -556.693478 | -50.4  | -556.71321                                                    | -82.8  |
| <sup>1</sup> 1-IM8                                          | 0.06869                       | -556.72658  | -137.3 | -556.81508                                                    | -169.9 |
| <sup>1</sup> 1-TS6                                          | 0.066454                      | -556.707262 | -86.6  | -556.72716                                                    | -119.4 |
| <sup>1</sup> 1-IM9                                          | 0.06776                       | -556.72937  | -144.6 | -556.81751                                                    | -178.7 |

---

|                                                             |         |            |       |            |       |
|-------------------------------------------------------------|---------|------------|-------|------------|-------|
| <sup>11</sup> I-M6+H <sub>2</sub>                           | 0.06350 | -556.68250 | -21.6 | -556.76079 | -41.0 |
| <sup>5</sup> Pt <sub>4</sub> +C <sub>2</sub> H <sub>6</sub> | 0.07457 | -556.67239 | 5.0   | -556.67978 | 5.0   |
| <sup>51</sup> I-M1                                          | 0.07439 | -556.68825 | -42.2 | -556.70217 | -53.8 |
| <sup>51</sup> -TS1                                          | 0.07087 | -556.68339 | -29.4 | -556.69873 | -44.8 |
| <sup>51</sup> -IM2                                          | 0.07243 | -556.69257 | -53.5 | -556.70716 | -66.9 |

---

Table S2: Zero-point energies (ZPE) (hartree), total energies ( $E_c$ ) (hartree) corrected by ZPE, and relative energies ( $E_r$ ) (kJ mol<sup>-1</sup>) of various species plus H<sub>2</sub> with respect to the reactants [Pt<sub>4</sub> + C<sub>2</sub>H<sub>4</sub>] in the C-H activation of C<sub>2</sub>H<sub>4</sub> by Pt<sub>4</sub> clusters calculated at the BPW91/Lanl2tz, 6-311++G(d, p) and BPW91/Lanl2tz, aug-cc-pvtz//BPW91/Lanl2tz, 6-311++G(d, p) levels of theory.

| Species                                                      | BPW91/Lanl2tz, 6-311++G(d, p) |            |        | BPW91/Lanl2tz, aug-cc-pvtz//<br>BPW91/Lanl2tz, 6-311++G(d, p) |        |
|--------------------------------------------------------------|-------------------------------|------------|--------|---------------------------------------------------------------|--------|
|                                                              | ZPE                           | $E_c$      | $E_r$  | $E_c$                                                         | $E_r$  |
| <sup>3</sup> Pt <sub>4</sub> + C <sub>2</sub> H <sub>4</sub> | 0.05134                       | -555.45968 | 0.0    | -555.51879                                                    | 0.0    |
| <sup>3</sup> 2-TS1                                           | 0.04844                       | -555.49393 | -89.9  | -555.55691                                                    | -107.7 |
| <sup>3</sup> 2-IM1                                           | 0.04969                       | -555.51097 | -134.7 | -555.57603                                                    | -154.6 |
| <sup>3</sup> 2-TS2                                           | 0.04767                       | -555.50146 | -109.7 | -555.56436                                                    | -129.3 |
| <sup>3</sup> 2-IM2                                           | 0.04884                       | -555.51296 | -139.2 | -555.57790                                                    | -161.8 |
| <sup>3</sup> 2-TS3                                           | 0.04320                       | -555.49583 | -94.9  | -555.55990                                                    | -129.3 |
| <sup>3</sup> 2-IM3                                           | 0.04475                       | -555.50734 | -125.1 | -555.57217                                                    | -157.4 |
| <sup>3</sup> 2-TS4                                           | 0.04326                       | -555.50307 | -113.9 | -555.56726                                                    | -148.5 |
| <sup>3</sup> 2-IM4                                           | 0.04449                       | -555.51905 | -155.9 | -555.58408                                                    | -189.4 |
| <sup>3</sup> 2-TS5                                           | 0.04860                       | -555.49629 | -96.1  | -555.56317                                                    | -123.7 |
| <sup>3</sup> 2-IM5                                           | 0.04012                       | -555.48516 | -66.9  | -555.54071                                                    | -87.0  |
| <sup>3</sup> 1-IM7+C <sub>2</sub> H <sub>2</sub>             | 0.04240                       | -555.44284 | 44.2   | -555.49874                                                    | 29.2   |
| <sup>3</sup> 2-IM6                                           | 0.04771                       | -555.50432 | -117.2 | -555.56989                                                    | -143.7 |
| <sup>3</sup> 2-TS6                                           | 0.04579                       | -555.48924 | -77.6  | -555.55408                                                    | -107.2 |
| <sup>3</sup> 2-IM7                                           | 0.04947                       | -555.52090 | -160.7 | -555.58915                                                    | -189.7 |
| <sup>3</sup> 2-TS7                                           | 0.04393                       | -555.49649 | -96.7  | -555.56090                                                    | -130   |
| <sup>3</sup> 2-IM8                                           | 0.04613                       | -555.53045 | -185.8 | -555.59699                                                    | -219.0 |
| <sup>3</sup> 2-TS8                                           | 0.04313                       | -555.51114 | -135.1 | -555.57521                                                    | -169.7 |
| <sup>3</sup> 2-IM9                                           | 0.04519                       | -555.53374 | -194.5 | -555.59934                                                    | -227.6 |
| <sup>3</sup> 2-IM10+H <sub>2</sub>                           | 0.4053                        | -555.47954 | -52.1  | -555.53716                                                    | -76.6  |
| <sup>1</sup> Pt <sub>4</sub> +C <sub>2</sub> H <sub>4</sub>  | 0.06118                       | -555.60758 | 48.2   | -555.67688                                                    | 48.2   |
| <sup>1</sup> 2-TS1                                           | 0.004804                      | -555.64392 | -47.2  | -555.71700                                                    | -65.7  |
| <sup>1</sup> 2-IM1                                           | 0.04945                       | -555.49186 | -84.5  | -555.56987                                                    | -139.1 |
| <sup>1</sup> 2-TS2                                           | 0.04741                       | -555.48339 | -62.3  | -555.73534                                                    | -115.4 |
| <sup>1</sup> 2-IM2                                           | 0.04872                       | -555.50302 | -113.8 | -555.58155                                                    | -171.7 |
| <sup>1</sup> 2-TS3                                           | 0.04325                       | -555.49064 | -81.3  | -555.55435                                                    | -114.6 |
| <sup>1</sup> 2-IM3                                           | 0.04466                       | -555.50615 | -122.0 | -555.56956                                                    | -150.8 |
| <sup>1</sup> 2-TS4                                           | 0.04303                       | -555.50375 | -115.7 | -555.56185                                                    | -134.9 |
| <sup>1</sup> 2-IM4                                           | 0.04542                       | -555.53182 | -189.4 | -555.59825                                                    | -224.2 |
| <sup>1</sup> 2-IM5                                           | 0.04016                       | -555.47014 | -27.5  | -555.52611                                                    | -48.6  |
| <sup>1</sup> 2-IM6                                           | 0.05031                       | -555.51601 | -147.9 | -555.58432                                                    | -174.8 |
| <sup>1</sup> 2-TS7                                           | 0.04387                       | -555.49782 | -100.1 | -555.73912                                                    | -134.7 |
| <sup>1</sup> 2-TS5                                           | 0.04860                       | -555.48543 | -67.6  | -555.73634                                                    | -114.9 |

|                                                  |         |            |        |            |        |
|--------------------------------------------------|---------|------------|--------|------------|--------|
| <sup>1</sup> 1-IM7+C <sub>2</sub> H <sub>2</sub> | 0.04262 | -555.4366  | 60.6   | -555.49690 | 34.6   |
| <sup>1</sup> 2-TS6                               | 0.04537 | -555.47715 | -45.9  | -555.54206 | -76.8  |
| <sup>1</sup> 2-IM7                               | 0.04944 | -555.51385 | -142.2 | -555.58155 | -169.8 |
| <sup>1</sup> 2-IM8                               | 0.04571 | -555.52760 | -178.3 | -555.77023 | -211.5 |
| <sup>1</sup> 2-TS8                               | 0.04335 | -555.50588 | -121.3 | -555.56971 | -154.7 |
| <sup>1</sup> 2-IM9                               | 0.04509 | -555.52951 | -183.3 | -555.59454 | -215.3 |
| <sup>1</sup> 2-IM10+H <sub>2</sub>               | 0.04032 | -555.46944 | -25.6  | -555.52517 | -45.7  |

---

**Table S3:** Zero-point energies (ZPE) (hartree), total energies ( $E_c$ ) (hartree) corrected by ZPE, and relative energies ( $E_r$ ) (kJ mol<sup>-1</sup>) various species with respect to the reactants [Pt<sub>4</sub>+ C<sub>2</sub>H<sub>6</sub>] in the C-C bond activation of C<sub>2</sub>H<sub>6</sub> by Pt<sub>4</sub> cluster calculated at the BPW91/Lanl2tz, aug-cc-pvtz//BPW91/Lanl2tz, 6-311++G(d, p) levels of theory

| Species                            | BPW91/Lanl2tz, 6-311++G(d, p) |             |        | BPW91/ Lanl2tz, aug-cc-pvtz//<br>BPW91/Lanl2tz, 6-311++G(d, p) |        |
|------------------------------------|-------------------------------|-------------|--------|----------------------------------------------------------------|--------|
|                                    | ZPE                           | $E_c$       | $E_r$  | $E_c$                                                          | $E_r$  |
| <sup>33</sup> -TS1                 | 0.07075                       | -556.65788  | 37.9   | -556.74593                                                     | 17.1   |
| <sup>33</sup> -IM2                 | 0.07194                       | -556.71663  | -117.9 | -556.80371                                                     | -131.5 |
| <sup>33</sup> -TS2                 | 0.06736                       | -556.67604  | -10.2  | -556.76215                                                     | -34.4  |
| <sup>33</sup> -IM3                 | 0.06801                       | -556.68177  | -25.4  | -556.76847                                                     | -49.3  |
| <sup>33</sup> -TS3                 | 0.06774                       | -556.66257  | 25.5   | -556.74947                                                     | -0.1   |
| <sup>33</sup> -IM4                 | 0.06908                       | -556.68506  | -34.2  | -556.76753                                                     | -44.0  |
| <sup>33</sup> -IM5+CH <sub>4</sub> | 0.06871                       | -556.68522  | -28.7  | -556.69858                                                     | -44.4  |
| <sup>33</sup> -TS4+CH <sub>4</sub> | 0.06854                       | -556.66176  | 32.9   | -556.67515                                                     | 17.1   |
| <sup>33</sup> -IM6+CH <sub>4</sub> | 0.06974                       | -556.69624  | -57.6  | -556.71011                                                     | -74.6  |
| <sup>33</sup> -TS5                 | 0.06926                       | -556.68986  | -40.9  | -556.77699                                                     | -68.4  |
| <sup>33</sup> -IM7                 | 0.06913                       | -556.73419  | -157.3 | -556.82247                                                     | -188.2 |
| <sup>33</sup> -TS6                 | 0.06708                       | -556.70822  | -89.1  | -556.79533                                                     | -122.3 |
| <sup>33</sup> -IM8                 | 0.06880                       | -556.73432  | -157.6 | -556.82337                                                     | -188.8 |
| <sup>33</sup> -TS7                 | 0.06606                       | -556.69625  | -57.7  | -556.78355                                                     | -94.0  |
| <sup>33</sup> -IM9                 | 0.06602                       | -556.73633  | -162.9 | -556.82412                                                     | -200.6 |
| <sup>33</sup> -TS8                 | 0.06565                       | -556.69758  | -61.2  | -556.78474                                                     | -98.2  |
| <sup>33</sup> -IM10                | 0.06867                       | -556.73311  | -154.4 | -556.82170                                                     | -187.3 |
| <sup>33</sup> -TS9                 | 0.06620                       | -556.71387  | -103.9 | -556.79981                                                     | -136.4 |
| <sup>33</sup> -IM11                | 0.06928                       | -556.73520  | -159.9 | -556.82331                                                     | -190.0 |
| <sup>33</sup> -TS10                | 0.06760                       | -556.71108  | -96.6  | -556.79765                                                     | -127.0 |
| <sup>33</sup> -IM12                | 0.06929                       | -556.71040  | -94.8  | -556.79867                                                     | -125.2 |
| <sup>33</sup> -TS11                | 0.065739                      | -556.65434  | 52.4   | -556.73987                                                     | 19.8   |
| <sup>33</sup> -IM13                | 0.06689                       | -556.70791  | -88.3  | -556.79529                                                     | -122.7 |
| <sup>33</sup> -TS12                | 0.06565                       | -556.70869  | -90.3  | -556.79428                                                     | -123.3 |
| <sup>33</sup> -IM14                | 0.06663                       | -556.71274  | -100.9 | -556.79989                                                     | -135.4 |
| <sup>33</sup> -TS13                | 0.06618                       | -556.69784  | -61.8  | -556.78337                                                     | -93.2  |
| <sup>33</sup> -IM15                | 0.06902                       | -556.70054  | -68.9  | -556.78819                                                     | -98.4  |
| <sup>13</sup> -IM2                 | 0.07182                       | -556.69661  | -64.8  | -556.79740                                                     | -115.3 |
| <sup>13</sup> -TS2                 | 0.06772                       | -556.66681  | 14.3   | -556.75369                                                     | -11.3  |
| <sup>13</sup> -IM3                 | 0.06847                       | -556.67236  | -0.5   | -556.75978                                                     | -25.3  |
| <sup>13</sup> -TS3                 | 0.06805                       | -556.65824  | 37.0   | -556.74933                                                     | 1.0    |
| <sup>13</sup> -IM4                 | 0.06903                       | -556.680556 | -22.2  | -556.69356                                                     | -31.2  |
| <sup>13</sup> -IM5+CH <sub>4</sub> | 0.06865                       | -556.68073  | -16.7  | -556.69406                                                     | -32.5  |
| <sup>13</sup> -TS4+CH <sub>4</sub> | 0.06850                       | -556.65189  | 58.8   | -556.66518                                                     | 43.3   |
| <sup>13</sup> -IM6+CH <sub>4</sub> | 0.06991                       | -556.68443  | -26.6  | -556.69799                                                     | -42.8  |
| <sup>13</sup> -TS5                 | 0.06617                       | -556.65041  | 57.2   | -556.73692                                                     | 31.3   |

|                     |         |            |        |            |        |
|---------------------|---------|------------|--------|------------|--------|
| <sup>13</sup> -IM7  | 0.06908 | -556.72192 | -125.1 | -556.81024 | -156.2 |
| <sup>13</sup> -TS6  | 0.06692 | -556.71305 | -101.8 | -556.79997 | -134.9 |
| <sup>13</sup> -IM8  | 0.06838 | -556.72754 | -139.8 | -556.81632 | -174.0 |
| <sup>13</sup> -TS7  | 0.06641 | -556.68921 | -39.2  | -556.77614 | -73.6  |
| <sup>13</sup> -IM9  | 0.06599 | -556.73681 | -164.1 | -556.82419 | -200.9 |
| <sup>13</sup> -TS8  | 0.06563 | -556.69521 | -54.9  | -556.78214 | -91.5  |
| <sup>13</sup> -IM10 | 0.06836 | -556.72903 | -143.7 | -556.81693 | -175.6 |
| <sup>13</sup> -TS9  | 0.06681 | -556.71273 | -100.9 | -556.79881 | 132.1  |
| <sup>13</sup> -IM11 | 0.06902 | -556.72342 | -129.0 | -556.81108 | -158.5 |
| <sup>13</sup> -TS10 | 0.06775 | -556.70852 | -89.9  | -556.79513 | -120.0 |
| <sup>13</sup> -IM12 | 0.06986 | -556.70755 | -87.3  | -556.79574 | -116.0 |
| <sup>13</sup> -TS11 | 0.06617 | -556.65041 | 57.2   | -556.73592 | 31.3   |
| <sup>13</sup> -IM13 | 0.06710 | -556.71393 | -109.6 | -556.73439 | -138.4 |
| <sup>13</sup> -TS12 | 0.06534 | -556.69849 | -69.1  | -556.78347 | -95.7  |
| <sup>13</sup> -IM14 | 0.06660 | -556.70805 | -94.2  | -556.79438 | -121.0 |
| <sup>13</sup> -TS13 | 0.06600 | -556.68506 | -33.8  | -556.77025 | -59.3  |
| <sup>13</sup> -IM15 | 0.06856 | -556.68593 | -36.1  | -556.77391 | -60.3  |

---



Table S4: Snapshot and standard orientation of all the species in the gas phase calculated at the BPW91/6-311++G(d, p), Lan12tz level. Distance lengths are reported in Å

C<sub>2</sub>H<sub>6</sub>

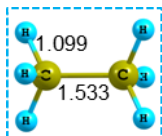

|   |             |             |             |
|---|-------------|-------------|-------------|
| C | 0.76641500  | -0.00000100 | -0.00000300 |
| C | -0.76641300 | -0.00000100 | 0.00000300  |
| H | 1.16844700  | 0.02235700  | 1.02295300  |
| H | 1.16837600  | 0.87474500  | -0.53085700 |
| H | 1.16838200  | -0.89709700 | -0.49214400 |
| H | -1.16837900 | 0.89711300  | 0.49211100  |
| H | -1.16838500 | -0.87472500 | 0.53088800  |
| H | -1.16845100 | -0.02238100 | -1.02295200 |

C<sub>2</sub>H<sub>4</sub>

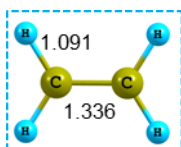

|   |             |             |             |
|---|-------------|-------------|-------------|
| C | 0.66808300  | 0.00000000  | -0.00000400 |
| C | -0.66808300 | 0.00000000  | -0.00000400 |
| H | 1.24255700  | -0.92781400 | 0.00012400  |
| H | 1.24254700  | 0.92782100  | -0.00010200 |
| H | -1.24254900 | -0.92782000 | -0.00010200 |
| H | -1.24255500 | 0.92781500  | 0.00012400  |

C<sub>2</sub>H<sub>2</sub>

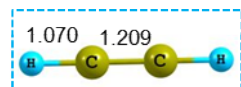

|   |            |            |             |
|---|------------|------------|-------------|
| C | 0.00000000 | 0.00000000 | 0.60457800  |
| H | 0.00000000 | 0.00000000 | 1.67420700  |
| C | 0.00000000 | 0.00000000 | -0.60457800 |
| H | 0.00000000 | 0.00000000 | -1.67420700 |

CH<sub>4</sub>

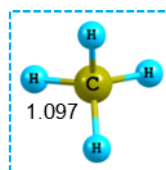

|   |             |             |            |
|---|-------------|-------------|------------|
| H | -0.39414700 | -1.02353800 | 0.00000000 |
| H | -0.35112300 | 0.52694300  | 0.89556800 |

|   |             |             |             |
|---|-------------|-------------|-------------|
| H | -0.35112300 | 0.52694300  | -0.89556800 |
| C | 0.00000000  | 0.00000700  | 0.00000000  |
| H | 1.09639300  | -0.03039000 | 0.00000000  |

H<sub>2</sub>

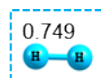

|   |            |            |             |
|---|------------|------------|-------------|
| H | 0.00000000 | 0.00000000 | 0.37441600  |
| H | 0.00000000 | 0.00000000 | -0.37441600 |

Pt<sub>4</sub>

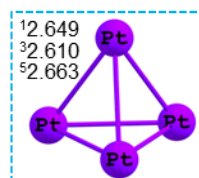

<sup>1</sup>Pt<sub>4</sub>

|    |             |             |             |
|----|-------------|-------------|-------------|
| Pt | 0.94377100  | -0.94347900 | -0.90000100 |
| Pt | -0.94375600 | 0.94348500  | -0.90000900 |
| Pt | 0.94378500  | 0.94345100  | 0.90001500  |
| Pt | -0.94379900 | -0.94345600 | 0.89999500  |

<sup>3</sup>Pt<sub>4</sub>

|    |             |             |             |
|----|-------------|-------------|-------------|
| Pt | 1.35989600  | -0.00796100 | -0.90420300 |
| Pt | -0.00205000 | -1.29181400 | 0.91429200  |
| Pt | -1.35861800 | -0.00527900 | -0.90592400 |
| Pt | 0.00077100  | 1.30505500  | 0.89583500  |

<sup>5</sup>Pt<sub>4</sub>

|    |             |             |             |
|----|-------------|-------------|-------------|
| Pt | 0.98484400  | 0.50980400  | 1.15978900  |
| Pt | -0.98503600 | -1.15967700 | 0.50977600  |
| Pt | 0.98498900  | -0.50990700 | -1.15964100 |
| Pt | -0.98479700 | 1.15978000  | -0.50992300 |

1-IM1

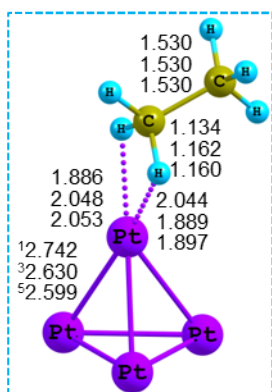

<sup>1</sup>I-IM1

|    |             |             |             |
|----|-------------|-------------|-------------|
| Pt | -1.10360800 | -0.03100800 | 1.32883200  |
| Pt | -0.32191200 | 1.51127500  | -0.59483400 |
| Pt | -0.86459300 | -1.05792800 | -0.98750600 |
| Pt | 1.35933000  | -0.41660200 | 0.18638900  |
| C  | 3.65033800  | -0.38975000 | 0.60363600  |
| H  | 3.23384600  | -1.17983400 | -0.09590500 |
| H  | 2.85409800  | 0.31366200  | 1.07579500  |
| C  | 4.69231800  | 0.45848700  | -0.12751700 |
| H  | 5.50947400  | -0.17409400 | -0.50391900 |
| H  | 4.24651700  | 0.98333000  | -0.98135000 |
| H  | 5.13050800  | 1.20871400  | 0.54605500  |
| H  | 4.04971200  | -0.93081200 | 1.47128500  |

<sup>3</sup>I-IM1

|    |             |             |             |
|----|-------------|-------------|-------------|
| Pt | 0.98943400  | -0.89069600 | -1.07131800 |
| Pt | 0.56653500  | 1.56477200  | -0.30888800 |
| Pt | 0.77792000  | -0.33465400 | 1.43491000  |
| Pt | -1.37730700 | -0.38993000 | -0.04005000 |
| C  | -3.70395200 | -0.40181500 | -0.04983200 |
| H  | -3.02134500 | -0.37090600 | 0.88992300  |
| H  | -3.16022000 | -0.53640700 | -1.03657800 |
| C  | -4.58353800 | 0.84906100  | -0.08413700 |
| H  | -5.14320700 | 0.95824700  | 0.85566700  |
| H  | -3.98070300 | 1.75338300  | -0.23000700 |
| H  | -5.31297500 | 0.78500700  | -0.90459000 |
| H  | -4.26997000 | -1.33320900 | 0.08646300  |

<sup>5</sup>I-IM1

|    |             |             |             |
|----|-------------|-------------|-------------|
| Pt | 1.23522200  | -1.17135100 | -0.46444100 |
| Pt | 0.18045900  | 1.23241500  | -1.05085300 |
| Pt | 0.71153700  | 0.65391300  | 1.35979100  |
| Pt | -1.19278700 | -0.72571200 | 0.13863300  |
| C  | -3.63501200 | -0.54898100 | 0.31493100  |
| H  | -2.74161900 | -0.11125000 | 0.92772700  |
| H  | -3.36876800 | -1.22855600 | -0.51915400 |
| C  | -4.46306900 | 0.63699300  | -0.18472500 |
| H  | -4.73080000 | 1.31174400  | 0.63986400  |

|   |             |             |             |
|---|-------------|-------------|-------------|
| H | -3.90958700 | 1.21745500  | -0.93324600 |
| H | -5.39503400 | 0.28080300  | -0.64747600 |
| H | -4.15138400 | -1.16101200 | 1.06690400  |

1-TS1

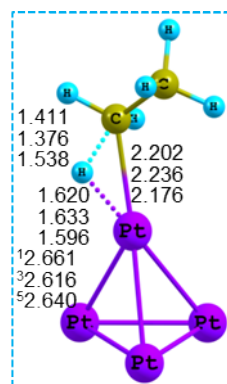

<sup>1</sup>I-TS1

|    |             |             |             |
|----|-------------|-------------|-------------|
| Pt | 0.87419500  | -0.30260000 | 1.41165500  |
| Pt | -1.44551700 | 0.17639800  | -0.02026200 |
| Pt | 0.61192000  | -1.23915500 | -0.93649200 |
| Pt | 0.88607700  | 1.36566300  | -0.50708000 |
| C  | -3.60896000 | 0.60923200  | 0.05707600  |
| H  | -2.70672600 | 0.41157600  | -1.01005500 |
| H  | -3.39459000 | 1.28930300  | 0.90104900  |
| C  | -4.41205100 | -0.62823400 | 0.46615500  |
| H  | -4.55996800 | -1.30906500 | -0.38291700 |
| H  | -3.91790100 | -1.19387000 | 1.26628000  |
| H  | -5.40821400 | -0.32549600 | 0.82957000  |
| H  | -4.16724000 | 1.21771900  | -0.67330600 |

<sup>3</sup>I-TS1

|    |             |             |             |
|----|-------------|-------------|-------------|
| Pt | 0.87058500  | -0.47867100 | 1.40751200  |
| Pt | -1.45671400 | -0.05509800 | -0.13779200 |
| Pt | 0.86328500  | -0.93470600 | -1.11088100 |
| Pt | 0.65050800  | 1.49280500  | -0.23374600 |
| C  | -3.57746000 | 0.50737800  | 0.29565100  |
| H  | -2.80977600 | 0.52169600  | -0.84609000 |
| H  | -3.23229200 | 0.89127000  | 1.26799000  |
| C  | -4.44624400 | -0.74789000 | 0.41242900  |
| H  | -4.73925300 | -1.13305100 | -0.57378800 |
| H  | -3.93014200 | -1.55561900 | 0.94862100  |
| H  | -5.36925100 | -0.51532100 | 0.96834000  |
| H  | -4.13487600 | 1.33635300  | -0.17080100 |

<sup>5</sup>I-TS1

|    |             |             |             |
|----|-------------|-------------|-------------|
| Pt | -0.95721700 | -0.00371300 | 1.37604900  |
| Pt | 1.37702900  | -0.04888100 | 0.19010700  |
| Pt | -0.62558400 | 1.39963300  | -0.76366900 |
| Pt | -0.71145700 | -1.33043000 | -0.79342800 |

|   |            |             |             |
|---|------------|-------------|-------------|
| C | 3.43464800 | -0.56436000 | -0.26649100 |
| H | 2.42908700 | 0.39445300  | -0.92537400 |
| H | 3.29254200 | -1.44446900 | 0.39162100  |
| C | 4.51961100 | 0.37762000  | 0.25397400  |
| H | 4.67792600 | 1.23266100  | -0.41753900 |
| H | 4.27926900 | 0.77151400  | 1.25041500  |
| H | 5.47447100 | -0.16727100 | 0.33326100  |
| H | 3.66500900 | -0.96198500 | -1.26388700 |

1-IM2

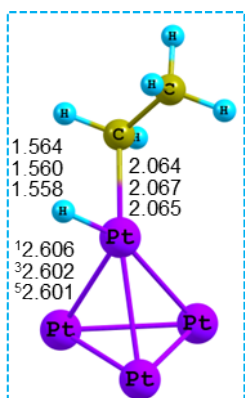<sup>1</sup>1-IM2

|    |             |             |             |
|----|-------------|-------------|-------------|
| Pt | 0.42164900  | 1.51353000  | -0.55884100 |
| Pt | -1.39449400 | -0.29654700 | 0.44686800  |
| Pt | 1.24743800  | -0.16414700 | 1.18074700  |
| Pt | 0.57752500  | -1.09016400 | -1.06040500 |
| C  | -3.20688900 | -0.15634600 | -0.53164900 |
| H  | -2.02478600 | -1.55730300 | 1.12477700  |
| H  | -2.98287500 | 0.37809100  | -1.46886000 |
| C  | -4.20079600 | 0.61931400  | 0.33560100  |
| H  | -4.45672600 | 0.07937900  | 1.25821700  |
| H  | -3.82897400 | 1.61714000  | 0.61324800  |
| H  | -5.14178700 | 0.77443800  | -0.22448500 |
| H  | -3.58398600 | -1.15798600 | -0.77939200 |

<sup>3</sup>1-IM2

|    |             |             |             |
|----|-------------|-------------|-------------|
| Pt | 0.51101700  | 1.35539000  | -0.78117400 |
| Pt | -1.41735100 | -0.21441100 | 0.44453000  |
| Pt | 1.20266900  | 0.01931500  | 1.25898800  |
| Pt | 0.56067300  | -1.22751500 | -0.90910600 |
| C  | -3.24071800 | -0.09079700 | -0.52023000 |
| H  | -2.09706200 | -1.36360500 | 1.25086700  |
| H  | -3.00873200 | 0.34435800  | -1.50616900 |
| C  | -4.20430600 | 0.80012800  | 0.27043000  |
| H  | -4.47474700 | 0.35932800  | 1.24035800  |
| H  | -3.79327100 | 1.80394500  | 0.45516600  |
| H  | -5.14105600 | 0.93728800  | -0.30003700 |
| H  | -3.66150000 | -1.09406000 | -0.67393300 |

<sup>5</sup>1-IM2

|    |             |             |             |
|----|-------------|-------------|-------------|
| Pt | 0.43289000  | 1.42735400  | -0.71643300 |
| Pt | -1.42461500 | -0.25701900 | 0.45886700  |
| Pt | 1.33629600  | -0.02579800 | 1.17425100  |
| Pt | 0.51477900  | -1.21060600 | -0.94157800 |
| C  | -3.28869300 | -0.07678300 | -0.40012600 |
| H  | -2.03344800 | -1.47369100 | 1.21860200  |
| H  | -3.11069500 | 0.39629200  | -1.37792800 |
| C  | -4.18640500 | 0.78748800  | 0.48993800  |
| H  | -4.38913800 | 0.31598200  | 1.46175800  |
| H  | -3.76424800 | 1.78641800  | 0.67267200  |
| H  | -5.16048000 | 0.93747500  | -0.01030800 |
| H  | -3.72083400 | -1.07333000 | -0.56197300 |

1-TS2

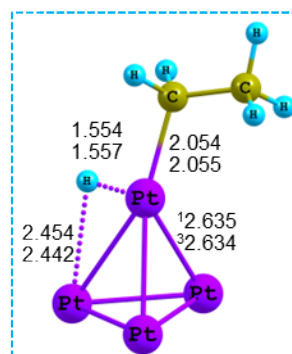<sup>1</sup>1-TS2

|    |             |             |             |
|----|-------------|-------------|-------------|
| Pt | -0.85832800 | -1.25814200 | -0.75786500 |
| Pt | 1.41116400  | -0.36873000 | 0.44261000  |
| Pt | -1.28530600 | 0.33525200  | 1.16708500  |
| Pt | -0.13205800 | 1.28348800  | -0.91067400 |
| C  | 3.40598600  | -0.06702400 | 0.82812900  |
| H  | 1.04945300  | 0.09444400  | 1.88091300  |
| H  | 3.56067700  | 0.76047400  | 1.53505600  |
| C  | 4.21881000  | 0.12606500  | -0.45345700 |
| H  | 4.05895500  | -0.68709700 | -1.17785700 |
| H  | 3.97178200  | 1.07503700  | -0.95077300 |
| H  | 5.30055200  | 0.14596700  | -0.22741600 |
| H  | 3.69361600  | -1.00100800 | 1.35406700  |

<sup>3</sup>1-TS2

|    |             |             |             |
|----|-------------|-------------|-------------|
| Pt | -0.81218900 | 1.35978700  | -0.57728600 |
| Pt | 1.42892200  | -0.21962800 | -0.49988400 |
| Pt | -1.28899300 | -1.15179700 | -0.45231800 |
| Pt | -0.19757800 | 0.05452500  | 1.55308100  |
| C  | 3.43666900  | -0.65236400 | -0.44823100 |
| H  | 1.06539900  | -1.70463900 | -0.79213900 |
| H  | 3.61462700  | -1.65212600 | -0.02661200 |
| C  | 4.24050000  | 0.42120400  | 0.29028900  |

|   |            |             |             |
|---|------------|-------------|-------------|
| H | 4.05663400 | 1.43062300  | -0.10811800 |
| H | 4.00941800 | 0.43492100  | 1.36497100  |
| H | 5.32441100 | 0.22933300  | 0.19007400  |
| H | 3.71385000 | -0.69630200 | -1.52074400 |

1-IM3

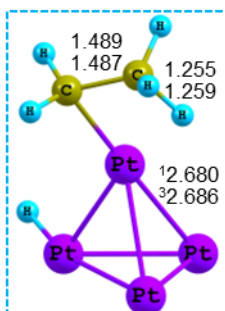

<sup>1</sup>1-IM3

|    |             |             |             |
|----|-------------|-------------|-------------|
| Pt | 1.03809300  | -0.16850900 | 1.31303600  |
| Pt | -1.43676100 | 0.06350300  | 0.28507100  |
| Pt | 0.55577800  | -1.27827500 | -0.93274600 |
| Pt | 0.59422700  | 1.38391000  | -0.66880100 |
| C  | -3.26062000 | 0.23074000  | -0.65330700 |
| H  | 0.46741600  | 2.84585000  | -0.09334000 |
| H  | -3.59991700 | 1.26832200  | -0.73887900 |
| C  | -3.62664900 | -0.50260000 | 0.58882200  |
| H  | -2.62478900 | -0.71928200 | 1.31870600  |
| H  | -4.24527200 | 0.04687400  | 1.30758700  |
| H  | -3.95781200 | -1.53855300 | 0.45640600  |
| H  | -3.32029000 | -0.32113700 | -1.59532900 |

<sup>1</sup>1-IM3

|    |             |             |             |
|----|-------------|-------------|-------------|
| Pt | 1.11526700  | -0.26978600 | 1.24239500  |
| Pt | -1.39239000 | -0.04319000 | 0.30724200  |
| Pt | 0.60644300  | -1.16548500 | -1.05390800 |
| Pt | 0.41614400  | 1.53274200  | -0.52582700 |
| C  | -3.34948900 | 0.26803800  | -0.28980400 |
| H  | 0.03473500  | 2.93982500  | 0.06834000  |
| H  | -3.78193000 | 1.16765700  | 0.15915400  |
| C  | -3.45744500 | -0.99496900 | 0.48817100  |
| H  | -2.35101000 | -1.36318300 | 0.96320200  |
| H  | -4.02137100 | -0.93408200 | 1.42645100  |
| H  | -3.69274000 | -1.89619700 | -0.08823200 |
| H  | -3.49222800 | 0.21359900  | -1.37142800 |

1-TS3

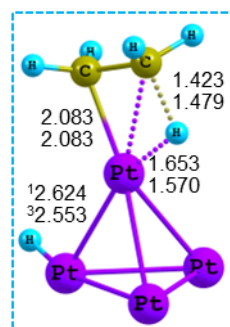

<sup>1</sup>1-TS3

|    |             |             |             |
|----|-------------|-------------|-------------|
| Pt | -1.44709400 | 0.04638700  | 0.28565000  |
| Pt | 0.59532900  | 1.36974000  | -0.69667900 |
| Pt | 1.00224400  | -0.12254900 | 1.32937200  |
| Pt | 0.59209200  | -1.29522300 | -0.90271700 |
| C  | -3.25354200 | 0.25608200  | -0.72953600 |
| H  | 0.44969400  | 2.84250500  | -0.15391000 |
| H  | -3.56679700 | 1.30217100  | -0.78987900 |
| C  | -3.58860600 | -0.49804000 | 0.47811500  |
| H  | -4.17143000 | 0.01516300  | 1.24933200  |
| H  | -3.85779100 | -1.55175600 | 0.35989300  |
| H  | -2.46384900 | -0.75768300 | 1.31094000  |
| H  | -3.25745200 | -0.27036300 | -1.68672800 |

<sup>3</sup>1-TS3

|    |             |             |             |
|----|-------------|-------------|-------------|
| Pt | 0.74127100  | -0.23944800 | 1.44428500  |
| Pt | -1.39903900 | -0.25195400 | -0.16592000 |
| Pt | 1.00791800  | -1.03917300 | -0.93018800 |
| Pt | 0.39089200  | 1.57365800  | -0.41120400 |
| C  | -3.33654000 | 0.43440900  | 0.27104500  |
| H  | -0.19855600 | 2.93308200  | 0.13236300  |
| H  | -3.37763100 | 0.98014400  | 1.21506200  |
| C  | -3.43646800 | -1.02529300 | 0.29654600  |
| H  | -2.23240900 | -1.68585300 | -0.02090300 |
| H  | -3.57421400 | -1.50736400 | 1.26872300  |
| H  | -4.00490500 | -1.50309300 | -0.50844600 |
| H  | -3.77549400 | 0.96793900  | -0.57630200 |

1-IM4

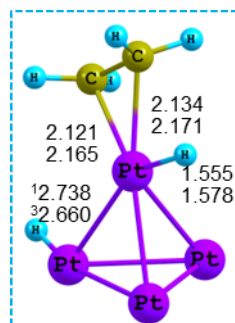

<sup>1</sup>1-IM4

|    |            |            |            |
|----|------------|------------|------------|
| Pt | 1.07727600 | 0.22287600 | 1.25263000 |
|----|------------|------------|------------|

|    |             |             |             |
|----|-------------|-------------|-------------|
| Pt | -1.49877800 | -0.38442400 | 0.17645300  |
| Pt | 0.80024000  | -1.31792600 | -0.67827800 |
| Pt | 0.33876300  | 1.37517500  | -0.83453600 |
| C  | -3.14264500 | 0.67659900  | 1.02758900  |
| H  | 0.06943700  | 2.85988500  | -0.40649700 |
| H  | -3.49896400 | 0.19548500  | 1.94057300  |
| C  | -3.50509200 | 0.15563200  | -0.25045200 |
| H  | -2.09037800 | -1.74351400 | 0.64596900  |
| H  | -4.16045000 | -0.71432300 | -0.32193100 |
| H  | -3.52350600 | 0.81408000  | -1.12281000 |
| H  | -2.87480700 | 1.73029000  | 1.13286700  |

<sup>3</sup>1-IM4

|    |             |             |             |
|----|-------------|-------------|-------------|
| Pt | 0.70092500  | 0.10353700  | 1.46636500  |
| Pt | -1.36467700 | -0.49498300 | -0.12139400 |
| Pt | 1.06024500  | -1.13800300 | -0.73005600 |
| Pt | 0.31002900  | 1.49540600  | -0.67560900 |
| C  | -3.09893700 | 0.76841300  | 0.16931300  |
| H  | -0.30387800 | 2.90629800  | -0.35003400 |
| H  | -2.89443000 | 1.46194800  | 0.98552300  |
| C  | -3.46243900 | -0.57418000 | 0.43208300  |
| H  | -1.61221600 | -2.03158700 | 0.13757600  |
| H  | -3.56609800 | -0.93199100 | 1.45695700  |
| H  | -4.01400300 | -1.14608400 | -0.31703200 |
| H  | -3.34982600 | 1.23136300  | -0.78724300 |

1-TS4

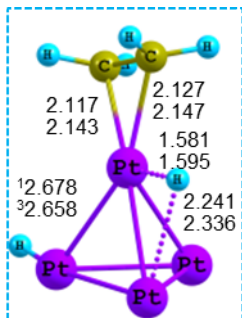

<sup>1</sup>1-TS4

|    |             |             |             |
|----|-------------|-------------|-------------|
| Pt | 1.10411200  | 0.06098700  | 1.27022500  |
| Pt | -1.54146100 | -0.11419100 | 0.12467700  |
| Pt | 0.62957500  | -1.38504700 | -0.69833200 |
| Pt | 0.54050700  | 1.36692700  | -0.79501200 |
| C  | -3.28530300 | 0.86912600  | 0.81296000  |
| H  | 0.62395700  | 2.86187400  | -0.34496500 |
| H  | -3.30011800 | 0.93463700  | 1.90336800  |
| C  | -3.65574200 | -0.34243100 | 0.15699400  |
| H  | -1.43092500 | -1.69171900 | 0.12874900  |
| H  | -3.96665500 | -1.20684100 | 0.74658200  |
| H  | -4.04819100 | -0.31834800 | -0.86278100 |

|   |             |            |            |
|---|-------------|------------|------------|
| H | -3.38491000 | 1.82354200 | 0.28776300 |
|---|-------------|------------|------------|

<sup>3</sup>1-TS4

|    |             |             |             |
|----|-------------|-------------|-------------|
| Pt | 0.66587700  | 0.11095900  | 1.47296300  |
| Pt | -1.42246800 | -0.25334500 | -0.15400100 |
| Pt | 0.90510600  | -1.31969500 | -0.64161100 |
| Pt | 0.56301300  | 1.41626900  | -0.73282400 |
| C  | -3.21679300 | 0.84322400  | 0.26056800  |
| H  | 0.26462900  | 2.93055600  | -0.45070700 |
| H  | -3.09260100 | 1.43144400  | 1.17131900  |
| C  | -3.49110500 | -0.55260200 | 0.33548100  |
| H  | -1.31887200 | -1.84543300 | -0.15507800 |
| H  | -3.59400700 | -1.04716100 | 1.30243700  |
| H  | -4.00197700 | -1.05148000 | -0.49166700 |
| H  | -3.50903300 | 1.41173800  | -0.62562100 |

1-IM5

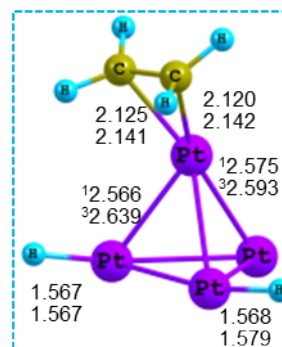

<sup>1</sup>1-IM5

|    |             |             |             |
|----|-------------|-------------|-------------|
| Pt | 0.97783500  | -0.29938200 | 1.30592300  |
| Pt | -1.30727400 | -0.64450800 | 0.14474300  |
| Pt | 1.20080900  | -0.51888700 | -1.16548400 |
| Pt | -0.21815600 | 1.61990400  | -0.15110200 |
| C  | -3.40669600 | -0.40343400 | 0.07088000  |
| H  | -1.13385400 | 2.36148800  | -1.18610300 |
| H  | -3.85459300 | -0.90027900 | 0.93789300  |
| C  | -2.98122100 | -1.18245200 | -1.04581100 |
| H  | 2.05122900  | -1.82678400 | -1.24260600 |
| H  | -3.09512600 | -2.27191100 | -1.02151100 |
| H  | -2.91308600 | -0.74964000 | -2.04503100 |
| H  | -3.67778000 | 0.64649600  | -0.05128200 |

<sup>3</sup>1-IM5

|    |             |             |             |
|----|-------------|-------------|-------------|
| Pt | -1.10025900 | -0.54591500 | -1.16713400 |
| Pt | 1.35819500  | -0.34273300 | -0.36680600 |
| Pt | -0.67157600 | -0.72199500 | 1.30781000  |
| Pt | -0.26665400 | 1.67268400  | 0.14463300  |
| C  | 3.35958800  | 0.33624800  | -0.02618100 |
| H  | 0.46840000  | 2.65033000  | 1.12339400  |
| H  | 3.81866400  | 0.51455600  | -1.00385300 |

|   |             |             |             |
|---|-------------|-------------|-------------|
| C | 3.22650300  | -0.98810400 | 0.45950600  |
| H | -0.81340900 | -2.26679400 | 1.60124400  |
| H | 3.58594200  | -1.82807500 | -0.14304200 |
| H | 3.12657600  | -1.18874100 | 1.52737800  |
| H | 3.36018600  | 1.19069100  | 0.65169500  |

1-IM6

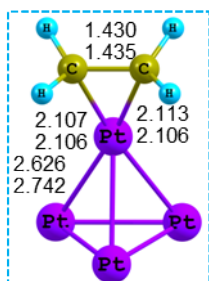<sup>1</sup>1-IM6

|    |             |             |             |
|----|-------------|-------------|-------------|
| Pt | 1.46416700  | 0.31247700  | 0.19180200  |
| Pt | -0.83588000 | 1.31398800  | -0.63429900 |
| Pt | -1.04776500 | -0.31856200 | 1.29200800  |
| Pt | -0.28779300 | -1.28696200 | -0.93440200 |
| C  | 3.30715900  | -0.15364300 | 1.11422900  |
| C  | 3.48395600  | -0.03429000 | -0.29933800 |
| H  | 3.28409300  | -1.13133000 | 1.60015600  |
| H  | 3.60513000  | 0.67355800  | 1.76766300  |
| H  | 3.60303400  | -0.92424800 | -0.92143500 |
| H  | 3.92821100  | 0.87627900  | -0.71413400 |

<sup>3</sup>1-IM6

|    |             |             |             |
|----|-------------|-------------|-------------|
| Pt | -1.46293800 | 0.00087800  | -0.38983300 |
| Pt | 0.95822900  | 1.27658800  | -0.56095600 |
| Pt | 0.96163300  | -1.26645600 | -0.57959100 |
| Pt | 0.25828600  | -0.01138900 | 1.56379400  |
| C  | -3.43095400 | -0.71553900 | -0.16917700 |
| C  | -3.42949000 | 0.71914100  | -0.16550400 |
| H  | -3.56489100 | -1.27239000 | 0.76111800  |
| H  | -3.74951500 | -1.25620300 | -1.06661100 |
| H  | -3.56243500 | 1.27156600  | 0.76757400  |
| H  | -3.74684500 | 1.26502000  | -1.06023700 |

1-IM7

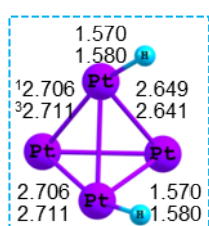<sup>1</sup>1-IM7

|    |            |            |             |
|----|------------|------------|-------------|
| Pt | 0.96752600 | 1.30301900 | -0.15296900 |
|----|------------|------------|-------------|

|    |             |             |             |
|----|-------------|-------------|-------------|
| Pt | 0.96753700  | -1.30301200 | -0.15297100 |
| Pt | -1.21855000 | -0.00000300 | -1.07267400 |
| Pt | -0.77303500 | -0.00000400 | 1.36027000  |
| H  | 2.20436000  | -1.72751700 | 0.71540700  |
| H  | 2.20434600  | 1.72753400  | 0.71540900  |

<sup>3</sup>1-IM7

|    |             |             |             |
|----|-------------|-------------|-------------|
| Pt | -0.96819900 | -1.26159900 | -0.17948600 |
| Pt | -0.96830000 | 1.26183700  | -0.17742700 |
| Pt | 1.26457000  | 0.00093200  | -1.05735000 |
| Pt | 0.73115100  | -0.00115700 | 1.40027700  |
| H  | -2.30968900 | 1.67656500  | 0.54677100  |
| H  | -2.30954100 | -1.67754300 | 0.54409100  |

1-TS5

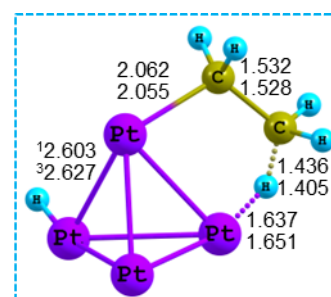<sup>1</sup>1-TS5

|    |             |             |             |
|----|-------------|-------------|-------------|
| Pt | 0.58646200  | -1.15588500 | -0.74745400 |
| Pt | 0.88507600  | 0.58140500  | 1.13575600  |
| Pt | -1.52747700 | -0.67111600 | 0.60489900  |
| Pt | -0.56855200 | 1.27100400  | -0.91065000 |
| C  | 2.76811300  | 0.37702900  | 0.31961800  |
| H  | 0.31645500  | 2.28057300  | -1.75091600 |
| H  | 3.05517200  | 1.33299800  | -0.13688100 |
| C  | 2.80869000  | -0.78010700 | -0.68320400 |
| H  | 3.13957300  | -1.73334300 | -0.25198100 |
| H  | 3.46161300  | -0.54174900 | -1.53900800 |
| H  | 3.41381300  | 0.14902600  | 1.18787500  |
| H  | 1.86285800  | -1.05093400 | -1.76653600 |

<sup>3</sup>1-TS5

|    |             |             |             |
|----|-------------|-------------|-------------|
| Pt | 0.75048900  | -0.71400200 | -1.08586100 |
| Pt | 0.73797400  | 0.35574300  | 1.29874200  |
| Pt | -1.30604300 | -1.08351100 | 0.40276800  |
| Pt | -0.80739100 | 1.40394800  | -0.57346000 |
| C  | 2.70225300  | 0.27856600  | 0.67069000  |
| H  | -0.22562700 | 2.78212900  | -1.08578900 |
| H  | 3.02600300  | 1.32634500  | 0.77736900  |
| C  | 2.92023000  | -0.25275000 | -0.74812300 |
| H  | 3.31630000  | -1.27560500 | -0.77758500 |
| H  | 3.60654200  | 0.39919900  | -1.31475600 |

|   |            |             |             |
|---|------------|-------------|-------------|
| H | 3.20228400 | -0.37263600 | 1.40542500  |
| H | 2.08730600 | -0.06418600 | -1.83075400 |

1-IM8

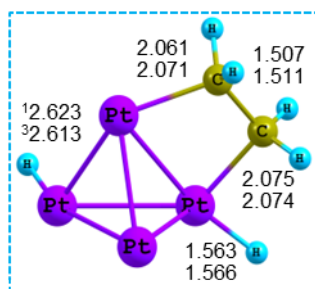

<sup>1</sup>1-IM8

|    |             |             |             |
|----|-------------|-------------|-------------|
| Pt | 1.01691800  | -1.19125000 | -0.38953000 |
| Pt | 0.14399500  | 1.52644500  | -0.43086400 |
| Pt | -0.11363100 | 0.01356200  | 1.62111300  |
| Pt | -1.56683100 | -0.45866900 | -0.61820600 |
| C  | 2.15113500  | 1.37040200  | -0.83810500 |
| H  | -1.99198700 | -0.56142800 | -2.11889700 |
| H  | 2.17945000  | 1.69876600  | -1.89302900 |
| C  | 2.70919400  | -0.01378700 | -0.63788200 |
| H  | 2.02463100  | -2.30055600 | 0.05408600  |
| H  | 3.23012800  | -0.41278300 | -1.52143300 |
| H  | 3.33232200  | -0.11332400 | 0.25741900  |
| H  | 2.58828100  | 2.12284000  | -0.15825900 |

<sup>3</sup>1-IM8

|    |             |             |             |
|----|-------------|-------------|-------------|
| Pt | 1.00049200  | -1.15239600 | -0.49718200 |
| Pt | 0.15081200  | 1.53344300  | -0.33288900 |
| Pt | -0.06512600 | -0.11936200 | 1.61213600  |
| Pt | -1.60539100 | -0.38244200 | -0.60450700 |
| C  | 2.17915000  | 1.43349900  | -0.73988500 |
| H  | -2.10264500 | -0.37913300 | -2.08663200 |
| H  | 2.25783100  | 1.87686700  | -1.74654200 |
| C  | 2.70409000  | 0.01889500  | -0.66672500 |
| H  | 1.90018200  | -2.40037900 | -0.20615300 |
| H  | 3.18791800  | -0.32053500 | -1.59524000 |
| H  | 3.34990500  | -0.17270800 | 0.19746200  |
| H  | 2.60600800  | 2.10055700  | 0.02718900  |

1-TS6

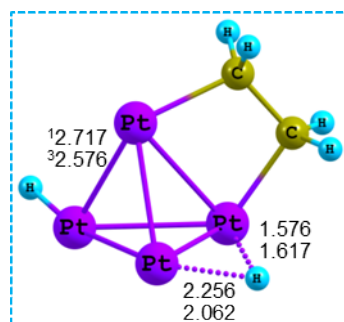

<sup>1</sup>1-TS6

|    |             |             |             |
|----|-------------|-------------|-------------|
| Pt | -0.78964900 | -1.08438400 | -0.77594500 |
| Pt | -0.68587700 | 0.59377000  | 1.21924600  |
| Pt | 0.48214700  | 1.28065300  | -0.96283900 |
| Pt | 1.57075700  | -0.72583200 | 0.47899400  |
| C  | -2.70614600 | 0.27686000  | 0.80747300  |
| H  | 1.86493800  | -1.88516000 | 1.48353300  |
| H  | -3.04468700 | -0.16764900 | 1.76164800  |
| C  | -2.82253600 | -0.65523200 | -0.36848800 |
| H  | -0.97109500 | -0.10251400 | -1.99515900 |
| H  | -3.25464600 | -1.63860000 | -0.12450200 |
| H  | -3.31151000 | -0.21602400 | -1.24386700 |
| H  | -3.14638300 | 1.27196500  | 0.64682700  |

<sup>3</sup>1-TS6

|    |             |             |             |
|----|-------------|-------------|-------------|
| Pt | 1.05518500  | -0.74213200 | -0.94621500 |
| Pt | 0.23895200  | 1.44318100  | 0.57353000  |
| Pt | -0.28083700 | -1.09021600 | 1.23362300  |
| Pt | -1.53721400 | 0.19181200  | -0.80983500 |
| C  | 2.25558900  | 1.63029100  | 0.09761700  |
| H  | -2.07983200 | 1.22321200  | -1.85260200 |
| H  | 2.32467400  | 2.44307200  | -0.63829700 |
| C  | 2.76089200  | 0.30835200  | -0.38382400 |
| H  | 1.25255500  | -1.92572800 | 0.13754600  |
| H  | 3.28733400  | 0.34781000  | -1.35670100 |
| H  | 3.32920200  | -0.26184700 | 0.35784400  |
| H  | 2.65240700  | 1.93530400  | 1.08344100  |

1-IM9

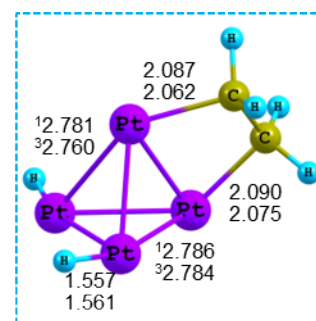

<sup>1</sup>1-IM9

|    |             |            |             |
|----|-------------|------------|-------------|
| Pt | -0.71711300 | 1.34460300 | -0.34958400 |
|----|-------------|------------|-------------|

|    |             |             |             |
|----|-------------|-------------|-------------|
| Pt | -0.71892000 | -1.33951100 | -0.36629000 |
| Pt | 0.40703600  | -0.01052900 | 1.58268200  |
| Pt | 1.57074600  | 0.00477300  | -0.83086000 |
| C  | -2.68865300 | -0.74990400 | -0.32708500 |
| H  | 3.07021400  | 0.00471500  | -0.42542000 |
| H  | -3.10233700 | -1.18551000 | -1.25417100 |
| C  | -2.68802200 | 0.75806700  | -0.31438600 |
| H  | -0.59846200 | -0.01951500 | 2.79786100  |
| H  | -3.10354500 | 1.20974300  | -1.23287600 |
| H  | -3.12935600 | 1.19974700  | 0.59041200  |
| H  | -3.13290900 | -1.20632600 | 0.56904900  |

<sup>3</sup>1-IM9

|    |             |             |             |
|----|-------------|-------------|-------------|
| Pt | -0.84621000 | 0.63694100  | 1.09462800  |
| Pt | -0.67802200 | -1.15441600 | -0.80368600 |
| Pt | 1.47419300  | -0.77041700 | 0.59306500  |
| Pt | 0.59449300  | 1.31983700  | -0.88844100 |
| C  | -2.69446300 | -0.77653800 | -0.49174300 |
| H  | 1.40692300  | 2.58820700  | -0.47888100 |
| H  | -3.03566800 | -0.57487200 | -1.52179500 |
| C  | -2.78539800 | 0.40183600  | 0.43500600  |
| H  | 1.60881900  | -2.08307700 | 1.43919200  |
| H  | -3.11384900 | 1.33702700  | -0.03472400 |
| H  | -3.33779100 | 0.19699300  | 1.37045400  |
| H  | -3.11663600 | -1.70772600 | -0.08800500 |

1-IM10

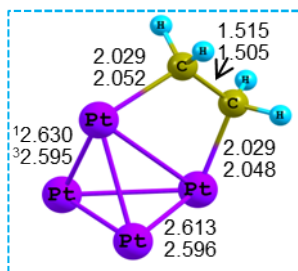

<sup>1</sup>1-IM10

|    |             |             |             |
|----|-------------|-------------|-------------|
| Pt | -1.59184700 | -0.53914800 | -0.39467500 |
| Pt | 1.59182500  | -0.53923100 | -0.39462900 |
| Pt | -0.00002600 | 0.03176800  | 1.59746800  |
| Pt | 0.00005900  | 1.54351000  | -0.61139100 |
| C  | 0.75739300  | -2.31032600 | -0.92593500 |
| H  | 1.17347500  | -2.49904800 | -1.93237400 |
| C  | -0.75750300 | -2.31034600 | -0.92578600 |
| H  | -1.17377400 | -2.49926500 | -1.93211100 |
| H  | -1.17369500 | -3.01783400 | -0.18656500 |
| H  | 1.17374500  | -3.01793900 | -0.18692100 |

<sup>3</sup>1-IM10

|    |             |            |            |
|----|-------------|------------|------------|
| Pt | -1.54323800 | 0.72759300 | 0.06029900 |
|----|-------------|------------|------------|

|    |             |             |             |
|----|-------------|-------------|-------------|
| Pt | 1.57541800  | 0.65409500  | -0.17778000 |
| Pt | -0.16620200 | -1.06793300 | -1.21010400 |
| Pt | 0.12404100  | -0.86406700 | 1.34824900  |
| C  | 0.79693900  | 2.54511100  | -0.07255700 |
| H  | 1.20713500  | 2.94756600  | 0.86807900  |
| C  | -0.70624100 | 2.59211800  | -0.12410300 |
| H  | -1.14705900 | 3.14241300  | 0.72640600  |
| H  | -1.09456500 | 2.98099900  | -1.07888100 |
| H  | 1.26877100  | 3.03000500  | -0.94748600 |

2-TS1

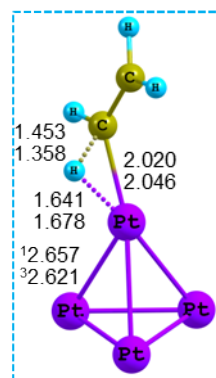

<sup>1</sup>2-TS1

|    |             |             |             |
|----|-------------|-------------|-------------|
| Pt | 1.47198000  | -0.14132400 | 0.21766200  |
| Pt | -0.47969800 | 1.40184200  | -0.71411200 |
| Pt | -1.15479700 | -0.02113800 | 1.28720400  |
| Pt | -0.64549600 | -1.26408800 | -0.85744200 |
| C  | 4.46136400  | -0.26962700 | 0.49760200  |
| C  | 3.39691900  | 0.44825900  | 0.05772700  |
| H  | 5.45255100  | -0.11284300 | 0.06413200  |
| H  | 4.37175200  | -1.04482400 | 1.26015700  |
| H  | 3.55278600  | 1.29346500  | -0.62108200 |
| H  | 2.49805100  | 0.71962800  | 1.16646800  |

<sup>3</sup>2-TS1

|    |             |             |             |
|----|-------------|-------------|-------------|
| Pt | 1.46565900  | -0.10539800 | 0.23999000  |
| Pt | -0.49672500 | 1.42673800  | -0.58076600 |
| Pt | -1.09751000 | -0.18849400 | 1.32880700  |
| Pt | -0.68974900 | -1.11929900 | -1.01565600 |
| C  | 4.49182000  | -0.48159700 | 0.30327600  |
| C  | 3.44459300  | 0.28083800  | -0.10973800 |
| H  | 5.45313400  | -0.43299000 | -0.21370600 |
| H  | 4.41444400  | -1.18048200 | 1.13746700  |
| H  | 3.61059000  | 1.03325700  | -0.88713700 |
| H  | 2.73272500  | 0.72806000  | 0.95689000  |

2-IM1



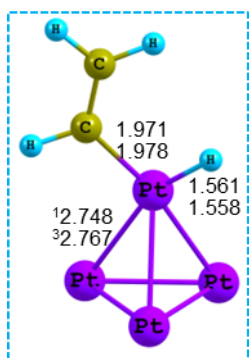

<sup>1</sup>2-IM1

|    |             |             |             |
|----|-------------|-------------|-------------|
| Pt | 1.44692100  | -0.16671000 | -0.38876300 |
| Pt | -0.48459100 | -0.96758700 | 1.19711500  |
| Pt | -1.16692500 | -0.44247300 | -1.15630400 |
| Pt | -0.57617200 | 1.54226300  | 0.34450900  |
| C  | 4.42015700  | 0.10923700  | -0.18391800 |
| C  | 3.19906500  | 0.39239900  | 0.32092100  |
| H  | 5.30566000  | 0.64905000  | 0.16920600  |
| H  | 4.57970800  | -0.63155400 | -0.96815500 |
| H  | 3.11649200  | 1.10522100  | 1.15463500  |
| H  | 2.18266700  | -1.44099400 | -0.90914900 |

<sup>3</sup>2-IM1

|    |             |             |             |
|----|-------------|-------------|-------------|
| Pt | 1.44853400  | -0.22614400 | -0.36388600 |
| Pt | -0.41780100 | -0.64594800 | 1.41338800  |
| Pt | -1.15174800 | -0.71280300 | -1.05994300 |
| Pt | -0.65841400 | 1.52428100  | 0.02618600  |
| C  | 4.41652300  | 0.21294900  | -0.26007200 |
| C  | 3.18416500  | 0.56487700  | 0.16115100  |
| H  | 5.28177600  | 0.84806100  | -0.04105300 |
| H  | 4.60872800  | -0.68772300 | -0.84448900 |
| H  | 3.06893000  | 1.46191700  | 0.78745000  |
| H  | 2.23190900  | -1.56136500 | -0.53647500 |

2-TS2

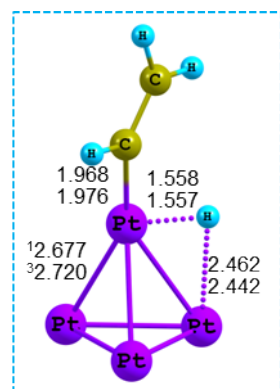

<sup>1</sup>2-TS2

|    |             |             |             |
|----|-------------|-------------|-------------|
| Pt | -1.51964300 | -0.01754200 | -0.11884900 |
| Pt | 0.72747200  | -0.73178400 | 1.28613100  |

|    |             |             |             |
|----|-------------|-------------|-------------|
| Pt | 0.79477100  | 1.52877600  | 0.00067200  |
| Pt | 0.79298600  | -0.80028800 | -1.21612600 |
| C  | -4.46818400 | 0.30535700  | -0.02915900 |
| C  | -3.36944200 | -0.28373100 | 0.49736600  |
| H  | -5.47019500 | -0.08735400 | 0.17705000  |
| H  | -4.41145100 | 1.16703900  | -0.69678900 |
| H  | -3.49111300 | -1.08085500 | 1.24661500  |
| H  | -1.65719900 | 1.49673600  | 0.22129800  |

<sup>3</sup>2-TS2

|    |             |             |             |
|----|-------------|-------------|-------------|
| Pt | 1.51591800  | 0.05769200  | 0.20863300  |
| Pt | -0.48085900 | -0.96991200 | -1.19780400 |
| Pt | -0.94170400 | 1.41076500  | -0.31290800 |
| Pt | -0.89065800 | -0.56558800 | 1.31344000  |
| C  | 4.43199500  | 0.69076900  | 0.08006900  |
| C  | 3.44457100  | -0.20720300 | -0.13218400 |
| H  | 5.48403100  | 0.38586600  | 0.05598200  |
| H  | 4.23714700  | 1.74147200  | 0.30209700  |
| H  | 3.71677000  | -1.23550500 | -0.41668500 |
| H  | 1.49228300  | 1.43617600  | -0.51485400 |

2-IM2

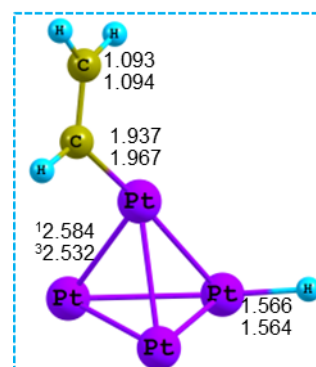

<sup>1</sup>2-IM2

|    |             |             |             |
|----|-------------|-------------|-------------|
| Pt | 1.41399000  | -0.49256800 | 0.13107900  |
| Pt | -0.92789700 | 0.38240100  | 1.32192100  |
| Pt | -1.12253300 | -1.15145100 | -0.63869600 |
| Pt | -0.08641000 | 1.35150600  | -0.87952100 |
| C  | 4.23645700  | -0.41108600 | 0.02414300  |
| C  | 3.17529700  | 0.03283900  | 0.74008100  |
| H  | 5.22430800  | -0.52604200 | 0.48642400  |
| H  | 4.15900700  | -0.69980800 | -1.02743100 |
| H  | 3.29190400  | 0.46655300  | 1.74219900  |
| H  | -1.57978000 | -2.51032500 | -0.00838600 |

<sup>3</sup>2-IM2

|    |             |             |             |
|----|-------------|-------------|-------------|
| Pt | 1.33905700  | -0.53070700 | -0.06745000 |
| Pt | -0.68887000 | 0.21933300  | 1.45797400  |
| Pt | -1.27253300 | -1.02059600 | -0.68646400 |

|    |             |             |             |
|----|-------------|-------------|-------------|
| Pt | -0.08467200 | 1.44918500  | -0.74883000 |
| C  | 4.20096800  | -0.77535300 | -0.02449900 |
| C  | 3.16650700  | -0.08301700 | 0.50529600  |
| H  | 5.20465100  | -0.72040900 | 0.41331500  |
| H  | 4.09820800  | -1.43204800 | -0.89342500 |
| H  | 3.32846500  | 0.62110000  | 1.32869100  |
| H  | -1.68882300 | -2.46113500 | -0.24125800 |

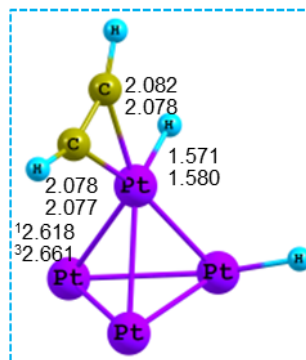

2-TS3

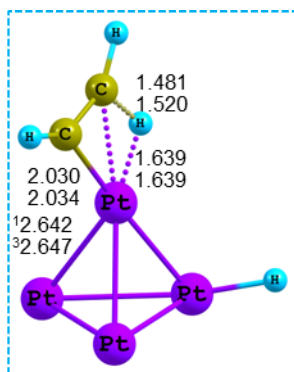

<sup>1</sup>2-IM3

|    |             |             |             |
|----|-------------|-------------|-------------|
| Pt | -1.47912100 | -0.06929900 | -0.13075400 |
| Pt | 0.59689800  | -0.24311900 | 1.46443800  |
| Pt | 0.74533000  | 1.45224900  | -0.49142900 |
| Pt | 0.79416700  | -1.20604000 | -0.85253400 |
| C  | -3.59005700 | 0.03894100  | -0.48178400 |
| C  | -3.27352000 | 0.28541100  | 0.75010700  |
| H  | -4.39966400 | -0.09235900 | -1.19057200 |
| H  | -2.46617500 | -0.07737700 | -1.43967800 |
| H  | -3.67527800 | 0.50599500  | 1.73098600  |
| H  | 0.45517100  | 2.88188900  | 0.09110200  |

<sup>3</sup>2-TS3

|    |             |             |             |
|----|-------------|-------------|-------------|
| Pt | -1.43074100 | 0.22314000  | 0.02235700  |
| Pt | 0.67252200  | -0.56243900 | 1.35956100  |
| Pt | 0.85877000  | 1.45414500  | -0.29760800 |
| Pt | 0.54295000  | -1.13782500 | -1.10031000 |
| C  | -3.54285500 | 0.35765000  | -0.26500400 |
| C  | -3.21123500 | -0.63660100 | 0.49792100  |
| H  | -4.35706800 | 0.91096500  | -0.71823900 |
| H  | -2.41458300 | 1.14947600  | -0.90523200 |
| H  | -3.60345200 | -1.45619700 | 1.08725400  |
| H  | 0.70664800  | 2.86191400  | 0.38668900  |

2-IM3

<sup>1</sup>2-IM3

|    |             |             |             |
|----|-------------|-------------|-------------|
| Pt | -1.46932900 | 0.00502600  | -0.25931800 |
| Pt | 0.52777500  | -0.25894300 | 1.49671600  |
| Pt | 0.80300000  | 1.42361300  | -0.45637500 |
| Pt | 0.76666600  | -1.22953500 | -0.83233600 |
| C  | -3.54947800 | 0.08482300  | -0.21846200 |
| C  | -3.12935400 | 0.14539500  | 0.98302700  |
| H  | -4.32980300 | 0.09305600  | -0.96277900 |
| H  | -1.84449100 | 0.11991600  | -1.78045800 |
| H  | -3.25314600 | 0.21388400  | 2.05266200  |
| H  | 0.50771800  | 2.85918300  | 0.10559300  |

<sup>3</sup>2-IM3

|    |             |             |             |
|----|-------------|-------------|-------------|
| Pt | -1.44573700 | 0.26784600  | -0.05140700 |
| Pt | 0.62991300  | -0.74721200 | 1.30182500  |
| Pt | 0.82847000  | 1.48202400  | -0.08564400 |
| Pt | 0.60258200  | -0.97748800 | -1.20641100 |
| C  | -3.51284100 | 0.06531900  | -0.10267200 |
| C  | -3.04215500 | -0.89029700 | 0.60015600  |
| H  | -4.32131000 | 0.59352000  | -0.58342500 |
| H  | -1.81998600 | 1.39339800  | -1.09556600 |
| H  | -3.12845900 | -1.79286000 | 1.18578800  |
| H  | 0.61205200  | 2.79260700  | 0.75594300  |

2-TS4

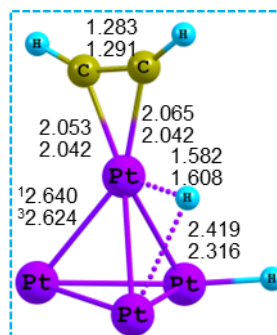

<sup>1</sup>2-TS4

|    |             |             |             |
|----|-------------|-------------|-------------|
| Pt | -1.48590600 | 0.04276700  | 0.19398900  |
| Pt | 0.88001100  | -0.32578900 | 1.35134000  |
| Pt | 0.73005300  | 1.42524800  | -0.55623800 |

|    |             |             |             |
|----|-------------|-------------|-------------|
| Pt | 0.51189000  | -1.20940600 | -0.99470100 |
| C  | -3.51633100 | 0.17121300  | 0.54691100  |
| C  | -3.32495600 | 0.08585100  | -0.71833600 |
| H  | -4.16945500 | 0.29782600  | 1.39770700  |
| H  | -1.36346700 | 0.50932500  | 1.70088200  |
| H  | -3.68749900 | 0.04332200  | -1.73648100 |
| H  | 0.65642600  | 2.84709900  | 0.10401700  |

<sup>3</sup>2-TS4

|    |             |             |             |
|----|-------------|-------------|-------------|
| Pt | 1.44812100  | -0.12108900 | 0.18306400  |
| Pt | -0.93068000 | -0.08770900 | 1.36436600  |
| Pt | -0.67149100 | -1.20436200 | -0.93550200 |
| Pt | -0.47277100 | 1.46941600  | -0.63290000 |
| C  | 3.42427600  | -0.55027700 | 0.46579800  |
| C  | 3.33721200  | 0.47533600  | -0.31270500 |
| H  | 4.03230600  | -1.25249400 | 1.01946800  |
| H  | 1.11898800  | -1.16528500 | 1.36043600  |
| H  | 3.80931000  | 1.25695700  | -0.89350100 |
| H  | -0.63760800 | -2.77751100 | -0.76914800 |

2-IM4

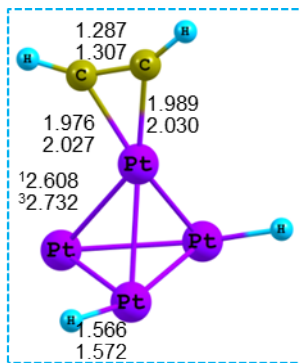

<sup>1</sup>2-IM4

|    |             |             |             |
|----|-------------|-------------|-------------|
| Pt | 1.44098200  | -0.28079200 | -0.09977500 |
| Pt | -0.71372100 | -0.62325300 | 1.32934700  |
| Pt | -1.11104900 | -0.61225800 | -1.14054000 |
| Pt | -0.19693500 | 1.64645200  | 0.00807900  |
| C  | 3.10662700  | -0.93566200 | -0.96682300 |
| C  | 3.36676300  | -0.54773300 | 0.25371100  |
| H  | 3.44872800  | -1.36596000 | -1.90068100 |
| H  | 0.36843900  | 2.65994300  | -1.04326300 |
| H  | 4.09456900  | -0.42778800 | 1.04955400  |
| H  | -1.45575300 | -2.11743000 | -1.40157200 |

<sup>3</sup>2-IM4

|    |             |             |             |
|----|-------------|-------------|-------------|
| Pt | -1.46455800 | -0.09534600 | 0.16147300  |
| Pt | 0.77326800  | -0.91705800 | -1.17223900 |
| Pt | 0.87165800  | -0.48972100 | 1.30896400  |
| Pt | 0.40886400  | 1.60915300  | -0.29215100 |
| C  | -3.49332500 | -0.15582800 | 0.17211900  |

|   |             |             |             |
|---|-------------|-------------|-------------|
| C | -3.05700300 | -1.12547400 | -0.55262200 |
| H | -4.30713900 | 0.41432500  | 0.60126600  |
| H | -0.08467100 | 2.85677800  | 0.52524800  |
| H | -3.19177000 | -1.98025800 | -1.20049600 |
| H | 0.92546300  | -1.95123200 | 1.88529400  |

2-IM5

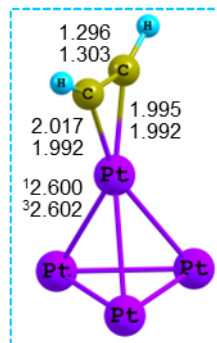

<sup>1</sup>2-IM5

|    |             |             |             |
|----|-------------|-------------|-------------|
| Pt | 1.47738700  | 0.00200600  | 0.17478900  |
| Pt | -1.04911400 | -0.01873700 | 1.32203300  |
| Pt | -0.51398300 | -1.33211300 | -0.81103400 |
| Pt | -0.52506300 | 1.34875000  | -0.78068400 |
| C  | 3.43488000  | 0.01630000  | -0.12919200 |
| C  | 3.21092200  | -0.01539800 | 1.15722800  |
| H  | 4.16297300  | 0.03884300  | -0.93367900 |
| H  | 3.60249400  | -0.03683700 | 2.16741800  |

<sup>3</sup>2-IM5

|    |             |             |             |
|----|-------------|-------------|-------------|
| Pt | 1.51159600  | 0.01236600  | -0.12576300 |
| Pt | -0.82533000 | 1.33611300  | -0.54392500 |
| Pt | -0.48196000 | -0.16362500 | 1.53731100  |
| Pt | -0.82646400 | -1.19091900 | -0.81311800 |
| C  | 3.38768800  | -0.61542500 | -0.36023300 |
| C  | 3.38587100  | 0.68034700  | -0.22481400 |
| H  | 3.94633000  | -1.52801000 | -0.53433400 |
| H  | 3.94060900  | 1.61149400  | -0.20673000 |

2-TS5

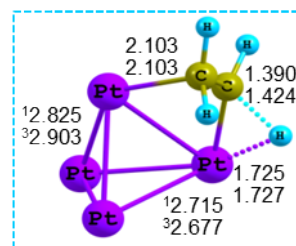

<sup>1</sup>2-TS5

|    |             |             |             |
|----|-------------|-------------|-------------|
| Pt | -1.16563000 | -1.00636100 | -0.59208700 |
| Pt | -0.37752800 | 1.59794400  | 0.17987200  |
| Pt | 1.45678300  | -0.01293300 | -0.93368500 |

|    |             |             |             |
|----|-------------|-------------|-------------|
| Pt | 0.62196500  | -0.65542200 | 1.31848600  |
| C  | -2.21518300 | 0.89338100  | -0.20017000 |
| H  | -1.98884500 | 1.92553700  | 0.70246400  |
| C  | -2.87144000 | -0.26646700 | 0.39029400  |
| H  | -2.79149800 | -0.44104400 | 1.46578300  |
| H  | -3.83316700 | -0.56009100 | -0.04444600 |
| H  | -2.64278100 | 1.30232300  | -1.12625900 |

<sup>3</sup>2-TS5

|    |             |             |             |
|----|-------------|-------------|-------------|
| Pt | -1.27000400 | -0.82869600 | -0.69059700 |
| Pt | -0.22192000 | 1.55125700  | 0.32106800  |
| Pt | 1.50414800  | -0.00286100 | -0.90977500 |
| Pt | 0.51847300  | -0.84751000 | 1.24921600  |
| C  | -2.13294400 | 1.12286800  | -0.12769400 |
| H  | -1.77330200 | 2.05506600  | 0.88709600  |
| C  | -2.91883500 | -0.01234900 | 0.32888900  |
| H  | -2.89809800 | -0.30180800 | 1.38224600  |
| H  | -3.88828700 | -0.15639700 | -0.16039300 |
| H  | -2.52404400 | 1.70914800  | -0.96921000 |

2-IM6

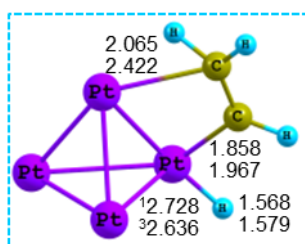

<sup>1</sup>2-IM6

|    |             |             |             |
|----|-------------|-------------|-------------|
| Pt | 1.28584700  | -0.73415200 | -0.70352200 |
| Pt | 0.04027300  | 1.63485900  | 0.38425400  |
| Pt | -0.37471800 | -0.95748800 | 1.26727400  |
| Pt | -1.41931000 | -0.13543000 | -0.94224400 |
| C  | 1.83134200  | 1.21509900  | -0.35914900 |
| H  | 0.04329900  | 3.08941600  | -0.21004800 |
| C  | 2.80260600  | 0.38085500  | 0.31104200  |
| H  | 2.71765100  | 0.16934200  | 1.37941300  |
| H  | 3.82541600  | 0.36208000  | -0.08179600 |
| H  | 2.10677100  | 1.79588400  | -1.24824100 |

<sup>3</sup>2-IM6

|    |             |             |             |
|----|-------------|-------------|-------------|
| Pt | 0.35198600  | 1.43635700  | 0.32397900  |
| Pt | 1.15754900  | -0.77787900 | -0.84388800 |
| Pt | -1.60788100 | 0.16221000  | -0.76966400 |
| Pt | -0.46556200 | -0.90110700 | 1.22903000  |
| C  | 2.76325600  | -0.15047300 | 0.10286500  |
| H  | 1.79065400  | -2.14527400 | -1.31622800 |
| C  | 2.73674900  | 1.11617400  | 0.60047800  |

|   |            |             |            |
|---|------------|-------------|------------|
| H | 2.17712200 | 1.98887800  | 0.09983800 |
| H | 3.45275200 | 1.48013100  | 1.34354200 |
| H | 3.56427500 | -0.84527400 | 0.37524800 |

2-TS6

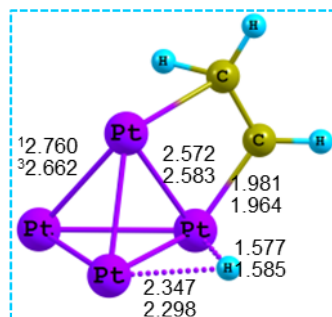

<sup>1</sup>2-TS6

|    |             |             |             |
|----|-------------|-------------|-------------|
| Pt | 0.73595200  | 1.11193900  | -0.71308600 |
| Pt | 1.04162100  | -1.04355400 | 0.65690000  |
| Pt | -1.18306100 | -0.85998400 | -0.93155100 |
| Pt | -1.16866400 | 0.75016000  | 1.00503100  |
| C  | 2.85790000  | -0.32416400 | 0.32907600  |
| H  | 0.77245200  | -0.17468100 | 1.94505500  |
| C  | 2.86323500  | 0.66701300  | -0.62837500 |
| H  | 2.23853100  | 0.54463000  | -1.64294900 |
| H  | 3.72077300  | 1.31773500  | -0.82713300 |
| H  | 3.72531900  | -0.51253100 | 0.97190800  |

<sup>3</sup>2-TS6

|    |             |             |             |
|----|-------------|-------------|-------------|
| Pt | -0.68198600 | 1.33174900  | -0.14602800 |
| Pt | -1.05434800 | -1.21275700 | 0.09182500  |
| Pt | 1.13015200  | 0.01607500  | 1.29249000  |
| Pt | 1.18077100  | -0.18336300 | -1.23245500 |
| C  | -2.85072600 | -0.43022100 | -0.04564400 |
| H  | -0.77655200 | -1.36486000 | -1.46141900 |
| C  | -2.86623300 | 0.94759700  | 0.14532600  |
| H  | -2.30582400 | 1.41279500  | 1.03435600  |
| H  | -3.71782100 | 1.56713300  | -0.15425500 |
| H  | -3.71595200 | -0.95224000 | -0.47165700 |

2-IM7

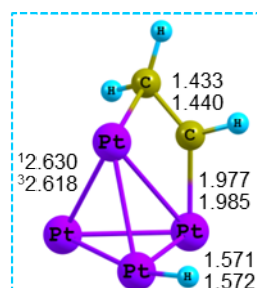

| <sup>1</sup> 2-IM7 |             |             |             |
|--------------------|-------------|-------------|-------------|
| Pt                 | 1.48838000  | -0.59086300 | -0.41462800 |
| Pt                 | -0.53070100 | 1.56373000  | -0.25066600 |
| Pt                 | -0.14810200 | -0.26897700 | 1.61907800  |
| Pt                 | -1.17221400 | -0.95360900 | -0.77945300 |
| C                  | 1.25032200  | 1.30980300  | -1.07060100 |
| H                  | -1.47207100 | -1.10142500 | -2.31465200 |
| C                  | 2.51238400  | 1.35906600  | -0.39413000 |
| H                  | 2.57868100  | 1.64013800  | 0.65854200  |
| H                  | 3.41864400  | 1.52091700  | -0.98589700 |
| H                  | 1.18422000  | 1.40521900  | -2.16748100 |

| <sup>3</sup> 2-IM7 |             |             |             |
|--------------------|-------------|-------------|-------------|
| Pt                 | 1.28030900  | -0.98628600 | -0.30132200 |
| Pt                 | -0.32436600 | 1.45497800  | -0.75111300 |
| Pt                 | 0.06852000  | 0.40072300  | 1.55990900  |
| Pt                 | -1.41104100 | -0.97997900 | -0.27741100 |
| C                  | 1.39926400  | 0.71637000  | -1.40349900 |
| H                  | -1.97773900 | -1.70043000 | -1.55410500 |
| C                  | 2.66705500  | 0.64109500  | -0.72530300 |
| H                  | 2.84249600  | 1.18958400  | 0.20064600  |
| H                  | 3.55949400  | 0.43596100  | -1.32522700 |
| H                  | 1.33097200  | 0.55406400  | -2.49340700 |

### 2-TS7

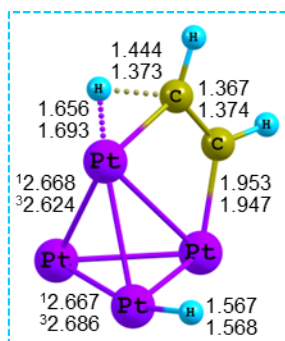

| <sup>1</sup> 2-TS7 |             |             |             |
|--------------------|-------------|-------------|-------------|
| Pt                 | -0.93490500 | 0.67854200  | 1.06955900  |
| Pt                 | 0.56761300  | 1.22928700  | -0.98085800 |
| Pt                 | -0.61293600 | -1.15355600 | -0.76378500 |
| Pt                 | 1.48605600  | -0.64581300 | 0.67862800  |
| C                  | -2.64734200 | -0.88969300 | -0.49936100 |
| C                  | -2.69143700 | 0.09720100  | 0.44505900  |
| H                  | -3.50775700 | -1.46868600 | -0.84725600 |
| H                  | -1.90855800 | -0.81557300 | -1.73763800 |
| H                  | -3.60292700 | 0.43042900  | 0.96083800  |
| H                  | 1.59728200  | -1.85107500 | 1.67344100  |

| <sup>3</sup> 2-TS7 |             |             |             |
|--------------------|-------------|-------------|-------------|
| Pt                 | -1.36568200 | -0.73239700 | -0.57608000 |

|    |             |             |             |
|----|-------------|-------------|-------------|
| Pt | -0.05093100 | -0.33309200 | 1.57776100  |
| Pt | 0.41732700  | 1.57947700  | -0.15600900 |
| Pt | 1.33225300  | -0.83025800 | -0.67083000 |
| C  | -1.46270000 | 2.14330800  | -0.70275200 |
| C  | -2.20242200 | 0.99910000  | -0.88003200 |
| H  | -1.78506500 | 3.10749700  | -1.11211300 |
| H  | -0.83444000 | 2.54424000  | 0.45078000  |
| H  | -3.20702200 | 1.00849000  | -1.32737600 |
| H  | 1.84581900  | -0.84560300 | -2.15226500 |

### 2-IM8

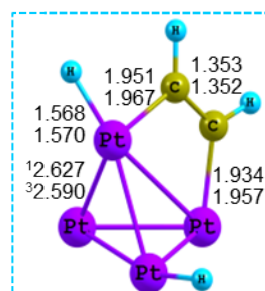

### <sup>1</sup>2-IM8

|    |             |             |             |
|----|-------------|-------------|-------------|
| Pt | 1.30376900  | -0.96380900 | -0.40220700 |
| Pt | 0.03742900  | 0.02549000  | 1.61914300  |
| Pt | -1.65836200 | -0.16710500 | -0.37790100 |
| Pt | 0.46764100  | 1.48552100  | -0.60588000 |
| C  | -1.29809200 | -1.95331500 | -1.07375700 |
| C  | 0.02539900  | -2.23510300 | -1.10132100 |
| H  | -2.08720700 | -2.65399600 | -1.35777700 |
| H  | -3.12788900 | -0.65701500 | -0.13730300 |
| H  | 0.48942800  | -3.13400800 | -1.53960200 |
| H  | 0.62462400  | 1.92800100  | -2.10090900 |

### <sup>3</sup>2-IM8

|    |             |             |             |
|----|-------------|-------------|-------------|
| Pt | 1.51228200  | -0.62004700 | -0.52609200 |
| Pt | -0.02233400 | -0.40448600 | 1.53456800  |
| Pt | -1.63087600 | -0.26510200 | -0.49082300 |
| Pt | 0.22164200  | 1.62829300  | -0.21586200 |
| C  | -0.92172600 | -1.81829900 | -1.46815800 |
| C  | 0.42499900  | -1.93190400 | -1.48963400 |
| H  | -1.60905300 | -2.53651100 | -1.92344200 |
| H  | -2.96065100 | -1.08407300 | -0.33003100 |
| H  | 0.94850200  | -2.75270900 | -1.99961900 |
| H  | 0.30591000  | 2.45912800  | -1.53986700 |

### 2-TS8

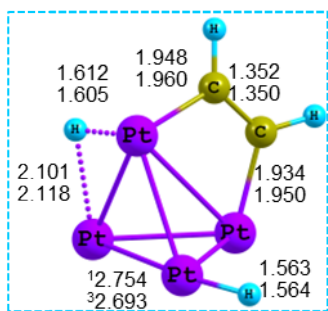

<sup>12</sup>-TS8

|    |             |             |             |
|----|-------------|-------------|-------------|
| Pt | 1.40443600  | -0.85840900 | -0.46195600 |
| Pt | 0.62801900  | 1.54536100  | -0.11122600 |
| Pt | -0.29462200 | -0.45554200 | 1.54112800  |
| Pt | -1.64408600 | 0.05956800  | -0.64540400 |
| C  | -1.11787800 | -1.50264000 | -1.68286000 |
| C  | 0.20740500  | -1.77439100 | -1.67408300 |
| H  | -1.88654100 | -2.13807000 | -2.13897400 |
| H  | 1.45442300  | 2.42834200  | -1.10126000 |
| H  | 0.70805900  | -2.46910200 | -2.36784000 |
| H  | -2.12538600 | -0.85527400 | 0.59144700  |

<sup>32</sup>-TS8

|    |             |             |             |
|----|-------------|-------------|-------------|
| Pt | -1.32423200 | 0.99927900  | 0.31056400  |
| Pt | -0.68950100 | -1.01891700 | -1.11693600 |
| Pt | 0.30118400  | -0.82613400 | 1.38007800  |
| Pt | 1.61850900  | 0.39996700  | -0.50170900 |
| C  | 1.11608100  | 2.29066500  | -0.37796800 |
| C  | -0.20061700 | 2.52026200  | -0.18554000 |
| H  | 1.90746500  | 3.04903300  | -0.42453200 |
| H  | -1.48898600 | -0.81952000 | -2.44655700 |
| H  | -0.69540100 | 3.48336800  | -0.37315800 |
| H  | 2.11931100  | 0.19440000  | 1.00957500  |

2-IM9

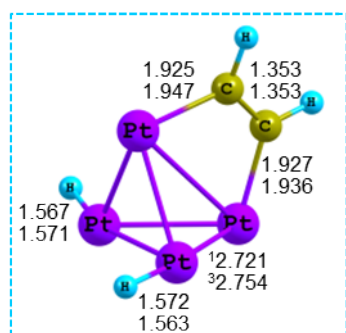

<sup>12</sup>-IM9

|    |             |             |             |
|----|-------------|-------------|-------------|
| Pt | -0.26961600 | -0.96466500 | -1.23914200 |
| Pt | -1.69962500 | 0.09417200  | 0.64463000  |
| Pt | 0.37913100  | 1.51830900  | -0.38158100 |
| Pt | 1.61115000  | -0.47095200 | 0.61083100  |

|   |             |             |             |
|---|-------------|-------------|-------------|
| C | 0.50947900  | -0.99586700 | 2.09930500  |
| C | -0.83124700 | -0.81306000 | 2.10637200  |
| H | 1.07918800  | -1.44252500 | 2.93148800  |
| H | -0.78460200 | -2.44436000 | -1.27361400 |
| H | -1.48377900 | -1.25328600 | 2.87507300  |
| H | 1.47864400  | 2.19834400  | -1.27658100 |

<sup>32</sup>-IM9

|    |             |             |             |
|----|-------------|-------------|-------------|
| Pt | 0.30936400  | 1.53788200  | -0.28984600 |
| Pt | 1.67845500  | -0.52033200 | 0.40093000  |
| Pt | -0.45674600 | -0.82622600 | -1.31107200 |
| Pt | -1.54444800 | -0.00936700 | 0.82863800  |
| C  | -0.54121400 | -1.02459500 | 2.15361300  |
| C  | 0.79558900  | -1.16236100 | 1.99983800  |
| H  | -1.11828400 | -1.52902900 | 2.94162900  |
| H  | 0.82022800  | 2.68915400  | 0.64851700  |
| H  | 1.45039600  | -1.58612400 | 2.77649700  |
| H  | -1.63529200 | -0.64487900 | -2.32208400 |

2-IM10

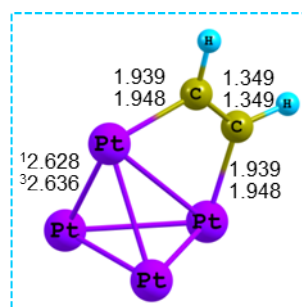

<sup>12</sup>-IM10

|    |             |             |             |
|----|-------------|-------------|-------------|
| Pt | -1.64035800 | -0.45202800 | -0.50575100 |
| Pt | 1.64035900  | -0.45202600 | -0.50575100 |
| Pt | 0.00000000  | -0.32789000 | 1.55067200  |
| Pt | -0.00000100 | 1.59570700  | -0.28945400 |
| C  | 0.67490400  | -1.90952100 | -1.33510000 |
| C  | -0.67490100 | -1.90952100 | -1.33510000 |
| H  | -1.29612000 | -2.72966100 | -1.72830100 |
| H  | 1.29612300  | -2.72966000 | -1.72830000 |

<sup>32</sup>-IM10

|    |             |             |             |
|----|-------------|-------------|-------------|
| Pt | 1.61071300  | 0.67334300  | -0.18066300 |
| Pt | -1.61072300 | 0.67331700  | -0.18069300 |
| Pt | -0.00001600 | -0.56349500 | 1.47514000  |
| Pt | 0.00003000  | -1.23066200 | -1.03480000 |
| C  | -0.67467800 | 2.36452000  | -0.42550900 |
| C  | 0.67464300  | 2.36452800  | -0.42547200 |
| H  | 1.29744900  | 3.26524100  | -0.52744600 |
| H  | -1.29748800 | 3.26523100  | -0.52747700 |

3-TS1

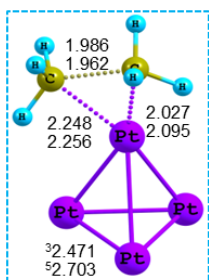

<sup>13</sup>-TS1

|    |             |             |             |
|----|-------------|-------------|-------------|
| Pt | -1.61106700 | 0.26248100  | 0.19247700  |
| Pt | 0.48643800  | 1.53325100  | -0.46566400 |
| Pt | 0.06936600  | -1.48934200 | -0.54922700 |
| Pt | 1.83302700  | -0.23530900 | 0.64377800  |
| C  | -3.21668400 | -1.27233100 | 0.53854000  |
| H  | -2.35491300 | -1.97041800 | 0.61073900  |
| H  | -3.78120900 | -1.41970100 | -0.38458400 |
| C  | -3.43746100 | 0.65116300  | 0.97942200  |
| H  | -2.82727900 | 1.62492900  | 0.66260800  |
| H  | -4.38822800 | 0.73752600  | 0.44362900  |
| H  | -3.55809000 | 0.66715700  | 2.06693700  |
| H  | -3.83109800 | -1.45680600 | 1.42649100  |

<sup>33</sup>-TS1

|    |             |             |             |
|----|-------------|-------------|-------------|
| Pt | 1.48445300  | -0.29608700 | 0.11411700  |
| Pt | -0.78660700 | -1.25150200 | -0.75271200 |
| Pt | -0.33805500 | 1.31492100  | -0.84494200 |
| Pt | -1.12539400 | 0.19515900  | 1.34339200  |
| C  | 3.25097100  | 1.07711000  | 0.23747200  |
| H  | 2.45970600  | 1.85008900  | 0.17851600  |
| H  | 3.81335200  | 1.02339200  | -0.69745300 |
| C  | 3.29767400  | -0.74568500 | 0.95124400  |
| H  | 2.60504300  | -1.68657500 | 0.75997000  |
| H  | 4.23905700  | -0.98464300 | 0.44720700  |
| H  | 3.41595200  | -0.62654500 | 2.03196400  |
| H  | 3.89210200  | 1.36147400  | 1.07875200  |

3-IM2

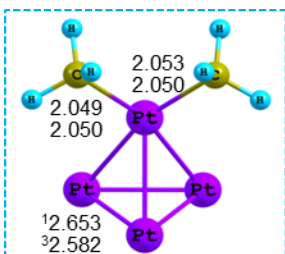

<sup>13</sup>-IM2

|    |             |             |             |
|----|-------------|-------------|-------------|
| Pt | 1.47816300  | 0.09517700  | -0.34678800 |
| Pt | -0.98625800 | -1.02071700 | -0.88590900 |
| Pt | -0.91141800 | 1.43946000  | -0.19756100 |

|    |             |             |             |
|----|-------------|-------------|-------------|
| Pt | -0.27709600 | -0.52112000 | 1.47378700  |
| C  | 2.92986100  | 1.35743100  | 0.35864500  |
| H  | 2.43679500  | 2.15275500  | 0.93538600  |
| H  | 3.43086900  | 1.79266100  | -0.52343000 |
| C  | 2.93982300  | -1.29267700 | -0.73823000 |
| H  | 2.46931200  | -2.28404200 | -0.80203900 |
| H  | 3.36631200  | -1.02461100 | -1.72172000 |
| H  | 3.74225200  | -1.30481400 | 0.01158800  |
| H  | 3.67184300  | 0.84107100  | 0.98248800  |

<sup>33</sup>-IM2

|    |             |             |             |
|----|-------------|-------------|-------------|
| Pt | -1.48430300 | 0.00002100  | -0.36231500 |
| Pt | 0.95928300  | 1.26811700  | -0.57536200 |
| Pt | 0.95929100  | -1.26802900 | -0.57554400 |
| Pt | 0.26393200  | -0.00011200 | 1.56380500  |
| C  | -2.94176500 | -1.43451800 | -0.21971100 |
| H  | -2.46353200 | -2.37979000 | 0.07424500  |
| H  | -3.38352700 | -1.54021700 | -1.22607900 |
| C  | -2.94176700 | 1.43455300  | -0.21968400 |
| H  | -2.46362500 | 2.37970100  | 0.07481700  |
| H  | -3.38309800 | 1.54064300  | -1.22620300 |
| H  | -3.73263000 | 1.17483100  | 0.49680600  |
| H  | -3.73231600 | -1.17503300 | 0.49721000  |

3-TS2

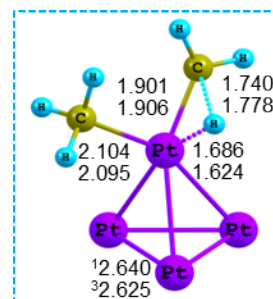

<sup>13</sup>-TS2

|    |             |             |             |
|----|-------------|-------------|-------------|
| Pt | 1.39911600  | 0.31966000  | -0.18102800 |
| Pt | -0.69439300 | -0.92884500 | -1.19876800 |
| Pt | -1.07910500 | 1.33014200  | 0.04394500  |
| Pt | -0.28743400 | -0.77138400 | 1.40445100  |
| C  | 2.71271000  | 1.69338900  | -0.14200900 |
| H  | 2.40386300  | 2.74689600  | -0.14026800 |
| H  | 2.05290400  | 0.91294900  | -1.55080900 |
| C  | 2.91978600  | -1.13378400 | -0.13020600 |
| H  | 2.57529700  | -1.96533900 | -0.75734800 |
| H  | 3.87454600  | -0.74458200 | -0.50793700 |
| H  | 3.03165800  | -1.45754900 | 0.91235300  |
| H  | 3.78814300  | 1.52210400  | -0.28313800 |

<sup>33</sup>-TS2

|    |             |             |             |
|----|-------------|-------------|-------------|
| Pt | -1.45233000 | 0.30139100  | 0.13477200  |
| Pt | 0.77767600  | -0.57096800 | 1.35037700  |
| Pt | 1.02653200  | 1.29485400  | -0.34368100 |
| Pt | 0.31943100  | -1.06934400 | -1.18603200 |
| C  | -2.81728700 | 1.57701200  | -0.24052900 |
| H  | -2.53157400 | 2.58126400  | -0.57795200 |
| H  | -2.08660400 | 1.19416600  | 1.33424500  |
| C  | -2.91885100 | -1.16241000 | 0.44546900  |
| H  | -2.49133500 | -1.86272500 | 1.17430200  |
| H  | -3.84888300 | -0.72986700 | 0.83597300  |
| H  | -3.10708000 | -1.66592600 | -0.51036700 |
| H  | -3.87977700 | 1.43263200  | -0.00985400 |

3-IM3

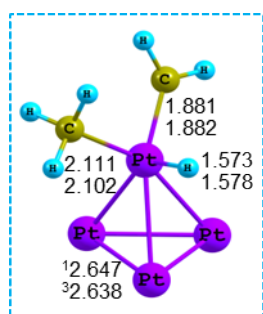

<sup>13</sup>3-IM3

|    |             |             |             |
|----|-------------|-------------|-------------|
| Pt | 1.40701500  | 0.23093800  | -0.31043700 |
| Pt | -0.75959500 | -1.17229700 | -0.93893800 |
| Pt | -1.03558900 | 1.32866100  | -0.24808900 |
| Pt | -0.26728300 | -0.41665900 | 1.54944700  |
| C  | 2.69206100  | 1.60380300  | -0.29464300 |
| H  | 2.36984700  | 2.65398900  | -0.32583900 |
| H  | 1.62200800  | -0.05116400 | -1.84296600 |
| C  | 2.94264000  | -1.18261400 | 0.00445900  |
| H  | 2.52686200  | -2.15663500 | -0.27927700 |
| H  | 3.82821200  | -0.95432200 | -0.60143500 |
| H  | 3.19229900  | -1.16724400 | 1.07245200  |
| H  | 3.77782400  | 1.43813100  | -0.33649100 |

<sup>33</sup>3-IM3

|    |             |             |             |
|----|-------------|-------------|-------------|
| Pt | 1.45165600  | 0.16427900  | -0.33032700 |
| Pt | -0.79480000 | -1.23976800 | -0.78589100 |
| Pt | -1.02028600 | 1.26597500  | -0.42519000 |
| Pt | -0.30097300 | -0.20068300 | 1.58783200  |
| C  | 2.76680800  | 1.51094900  | -0.32004000 |
| H  | 2.46298800  | 2.55660900  | -0.46699600 |
| H  | 1.55647900  | -0.25210100 | -1.84893500 |
| C  | 2.96138600  | -1.24123000 | 0.07347600  |
| H  | 2.49866300  | -2.22483100 | -0.07307200 |
| H  | 3.81075100  | -1.11520500 | -0.60838800 |

|   |            |             |             |
|---|------------|-------------|-------------|
| H | 3.27742800 | -1.11481400 | 1.11548200  |
| H | 3.84796000 | 1.32737600  | -0.25973400 |

3-TS3

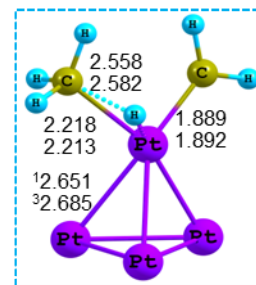

<sup>13</sup>3-TS3

|    |             |             |             |
|----|-------------|-------------|-------------|
| Pt | -1.43585700 | 0.07509500  | 0.13992500  |
| Pt | 0.83910800  | -0.65826500 | 1.30059800  |
| Pt | 0.67114600  | 1.52463100  | -0.17849800 |
| Pt | 0.59477700  | -0.88341200 | -1.26846900 |
| C  | -2.83280400 | 1.34091900  | 0.01193700  |
| H  | -2.61117300 | 2.39418600  | -0.19928800 |
| H  | -2.35687200 | -0.74109100 | 1.14881400  |
| C  | -2.86039500 | -1.61593600 | -0.03745900 |
| H  | -2.43737200 | -2.54359200 | 0.36044600  |
| H  | -3.88897600 | -1.46150100 | 0.31345400  |
| H  | -2.84790700 | -1.62783800 | -1.13247500 |
| H  | -3.89411100 | 1.10214100  | 0.16489400  |

<sup>33</sup>3-TS3

|    |             |             |             |
|----|-------------|-------------|-------------|
| Pt | 1.46371500  | -0.02058600 | -0.07737900 |
| Pt | -0.80793600 | -0.87395800 | -1.18846900 |
| Pt | -0.56919900 | 1.57446900  | -0.09062300 |
| Pt | -0.75656300 | -0.58853500 | 1.32063000  |
| C  | 2.93952700  | 1.16084700  | -0.15433400 |
| H  | 2.79911600  | 2.23960400  | -0.28770000 |
| H  | 2.26315700  | -1.12756000 | -0.88910200 |
| C  | 2.78002600  | -1.70169000 | 0.50350900  |
| H  | 2.40518700  | -2.69202400 | 0.22533800  |
| H  | 3.83365000  | -1.58212900 | 0.22497700  |
| H  | 2.65478900  | -1.54397000 | 1.58057100  |
| H  | 3.98537100  | 0.82270000  | -0.15353200 |

3-IM4

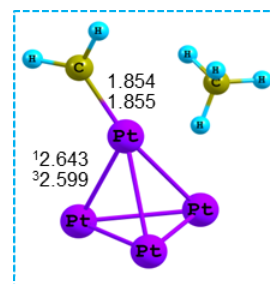



|                    |             |             |             |
|--------------------|-------------|-------------|-------------|
| <sup>1</sup> 3-IM4 |             |             |             |
| Pt                 | 0.17369200  | 1.58879700  | 0.02369900  |
| Pt                 | -0.46019500 | -0.72566900 | 1.31359100  |
| Pt                 | 1.67399600  | -0.58260100 | -0.11907300 |
| Pt                 | -0.65071000 | -0.69653800 | -1.21646600 |
| C                  | 0.96803000  | 3.26377000  | -0.00124300 |
| H                  | 2.04694400  | 3.45988600  | -0.07000100 |
| H                  | -6.14306000 | 1.35212500  | -0.59082800 |
| C                  | -6.56731600 | 0.52302700  | -0.01173100 |
| H                  | -7.65850600 | 0.62575000  | 0.02935900  |
| H                  | -6.30748300 | -0.42870100 | -0.49093300 |
| H                  | -6.15943800 | 0.54289600  | 1.00611600  |
| H                  | 0.34816600  | 4.17619600  | 0.05765000  |

|                    |             |             |             |
|--------------------|-------------|-------------|-------------|
| <sup>3</sup> 3-IM4 |             |             |             |
| Pt                 | 0.17391500  | 1.57507500  | 0.03035500  |
| Pt                 | -0.47578900 | -0.75786500 | 1.29703100  |
| Pt                 | 1.69009400  | -0.53102800 | -0.10881300 |
| Pt                 | -0.64538900 | -0.71727900 | -1.21828000 |
| C                  | 0.96887000  | 3.25142800  | 0.01198600  |
| H                  | 2.04554600  | 3.45792500  | -0.05240500 |
| H                  | -6.17941100 | 1.45389800  | -0.61756100 |
| C                  | -6.61422800 | 0.65004500  | -0.01144200 |
| H                  | -7.70312100 | 0.77324700  | 0.03365000  |
| H                  | -6.37415700 | -0.31977000 | -0.46395300 |
| H                  | -6.19903900 | 0.69224800  | 1.00277900  |
| H                  | 0.34147600  | 4.15912100  | 0.07140000  |

3-IM5

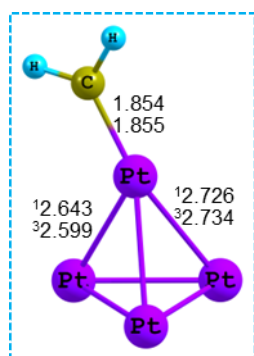

|                    |             |             |             |
|--------------------|-------------|-------------|-------------|
| <sup>1</sup> 3-IM5 |             |             |             |
| Pt                 | 0.86157500  | -0.56406800 | 1.27007600  |
| Pt                 | -1.54780800 | -0.42761000 | 0.00136300  |
| Pt                 | 0.86075400  | -0.56982800 | -1.26796800 |
| Pt                 | 0.18620800  | 1.56736200  | -0.00349800 |
| C                  | -3.36847200 | -0.07769200 | 0.00035200  |
| H                  | -3.83084600 | 0.91902300  | -0.00200200 |
| H                  | -4.09516000 | -0.90968600 | 0.00195900  |

<sup>3</sup>3-IM5

|    |             |             |             |
|----|-------------|-------------|-------------|
| Pt | 0.91977100  | -0.50702600 | 1.26115400  |
| Pt | -1.50710900 | -0.52522800 | 0.00152900  |
| Pt | 0.91862400  | -0.51167400 | -1.25994700 |
| Pt | 0.02743300  | 1.57267700  | -0.00278600 |
| C  | -3.34757600 | -0.29005800 | 0.00056500  |
| H  | -3.88102900 | 0.66986800  | -0.00170700 |
| H  | -4.01364500 | -1.17193700 | 0.00219900  |

3-TS4

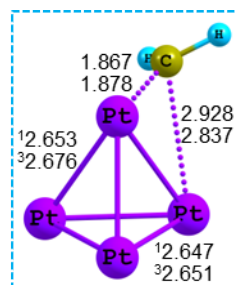

<sup>1</sup>3-TS4

|    |             |             |             |
|----|-------------|-------------|-------------|
| Pt | 1.13689700  | -1.03058600 | -0.27092800 |
| Pt | -1.28499800 | -0.39368100 | -0.96697500 |
| Pt | 0.41557600  | 1.53250100  | -0.33234300 |
| Pt | -0.55865000 | -0.09840700 | 1.54465800  |
| C  | 2.72442500  | -0.18140500 | 0.22178500  |
| H  | 2.86128400  | 0.30301100  | 1.19717600  |
| H  | 3.50384700  | 0.01886400  | -0.53207500 |

<sup>3</sup>3-TS4

|    |             |             |             |
|----|-------------|-------------|-------------|
| Pt | 1.20570100  | -1.03937700 | -0.11930400 |
| Pt | -1.21003100 | -0.42457700 | -1.03511400 |
| Pt | 0.44804300  | 1.51658300  | -0.32048900 |
| Pt | -0.73572600 | -0.05805000 | 1.43962800  |
| C  | 2.73391900  | -0.03829800 | 0.31714800  |
| H  | 2.85185300  | 0.48767500  | 1.27353700  |
| H  | 3.52153300  | 0.16493300  | -0.42459700 |

3-IM6

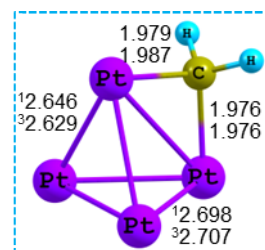

<sup>1</sup>3-IM6

|    |             |             |             |
|----|-------------|-------------|-------------|
| Pt | 1.53720200  | -0.00040200 | 0.78163500  |
| Pt | -0.00032300 | 1.36815600  | -0.89300600 |
| Pt | -1.53683000 | -0.00062000 | 0.78209600  |
| Pt | -0.00007600 | -1.36727700 | -0.89394000 |
| C  | 0.00021400  | 0.00135800  | 2.02620700  |

|   |            |             |            |
|---|------------|-------------|------------|
| H | 0.00031900 | -0.92926300 | 2.62710400 |
| H | 0.00049800 | 0.93230900  | 2.62646000 |

<sup>33</sup>-IM6

|    |             |             |             |
|----|-------------|-------------|-------------|
| Pt | -1.49312400 | -0.76453000 | -0.42088800 |
| Pt | -0.06586900 | 1.48905700  | -0.65218400 |
| Pt | 1.57607900  | -0.64666700 | -0.39127200 |
| Pt | -0.02766300 | 0.12128400  | 1.57348500  |
| C  | 0.09669000  | -1.81019400 | -0.99306800 |
| H  | 0.13189800  | -2.77785000 | -0.45693000 |
| H  | 0.11289600  | -1.89421800 | -2.09771500 |

3-IM7

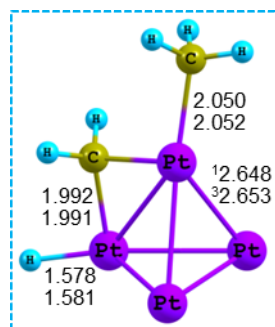

3-TS5

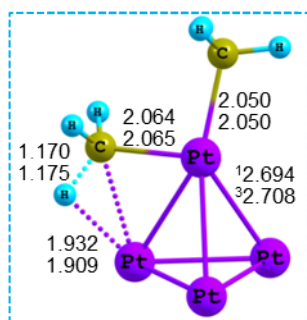

<sup>13</sup>-TS5

|    |             |             |             |
|----|-------------|-------------|-------------|
| Pt | 1.51961900  | -0.26620500 | 0.33711800  |
| Pt | -1.12727600 | -0.30619500 | 1.25206100  |
| Pt | -0.61170800 | -1.03811600 | -1.11794000 |
| Pt | -0.41594000 | 1.49832600  | -0.48228700 |
| C  | 3.44228700  | -0.87555300 | -0.02695100 |
| H  | 3.43158600  | -1.96857400 | -0.17151000 |
| H  | 4.06407500  | -0.63230600 | 0.85148200  |
| C  | 1.91410500  | 1.74922000  | 0.13106700  |
| H  | 1.06229100  | 2.55089800  | 0.15229000  |
| H  | 2.44380000  | 1.99932200  | 1.06686300  |
| H  | 2.53974700  | 1.95515800  | -0.74478300 |
| H  | 3.87396400  | -0.39569700 | -0.91729500 |

<sup>33</sup>-TS5

|    |             |             |             |
|----|-------------|-------------|-------------|
| Pt | 1.52167900  | -0.28900000 | 0.29506900  |
| Pt | -1.08469300 | -0.33176500 | 1.27628900  |
| Pt | -0.66333800 | -0.99531500 | -1.13941600 |
| Pt | -0.41010500 | 1.50734100  | -0.43820400 |
| C  | 3.45004400  | -0.88921600 | -0.05695300 |
| H  | 3.43303900  | -1.95569300 | -0.33473600 |
| H  | 4.02337200  | -0.76485100 | 0.87812800  |
| C  | 1.91444200  | 1.73053600  | 0.11673600  |
| H  | 1.07404900  | 2.55070400  | 0.15718000  |
| H  | 2.45715000  | 1.96732300  | 1.04816600  |
| H  | 2.52975800  | 1.94928200  | -0.76346000 |
| H  | 3.93934700  | -0.31302100 | -0.85551700 |

<sup>13</sup>-IM7

|    |             |             |             |
|----|-------------|-------------|-------------|
| Pt | -1.57047200 | 0.03568100  | -0.37577600 |
| Pt | 0.97871600  | -0.67532400 | -1.18844200 |
| Pt | 0.23904700  | -1.09409900 | 1.19372100  |
| Pt | 0.87091500  | 1.45601900  | 0.37007500  |
| C  | -3.55998600 | 0.24928700  | 0.07162700  |
| H  | -3.99120300 | -0.76267400 | 0.15489900  |
| H  | -4.05601800 | 0.78713900  | -0.75417200 |
| C  | -1.01189700 | 1.93165300  | -0.07306400 |
| H  | 1.41031300  | 2.84000900  | -0.16186900 |
| H  | -1.12653800 | 2.51034300  | -1.00287500 |
| H  | -1.49586200 | 2.40916600  | 0.79452100  |
| H  | -3.72948300 | 0.79276600  | 1.01105000  |

<sup>33</sup>-IM7

|    |             |             |             |
|----|-------------|-------------|-------------|
| Pt | 1.57384000  | 0.00162200  | 0.33105900  |
| Pt | -0.96239200 | -0.66053300 | 1.20898200  |
| Pt | -0.30059700 | -1.08475400 | -1.19485900 |
| Pt | -0.83910900 | 1.47504700  | -0.34892600 |
| C  | 3.58822500  | 0.18447000  | -0.01202400 |
| H  | 4.00097000  | -0.83360200 | -0.11066300 |
| H  | 4.05121000  | 0.68064900  | 0.85794200  |
| C  | 1.06323300  | 1.91212700  | 0.04415600  |
| H  | -1.32784200 | 2.89746400  | 0.13926500  |
| H  | 1.22018200  | 2.48870100  | 0.96906100  |
| H  | 1.53146900  | 2.38026700  | -0.83732600 |
| H  | 3.81942300  | 0.75905800  | -0.91902800 |

3-TS6

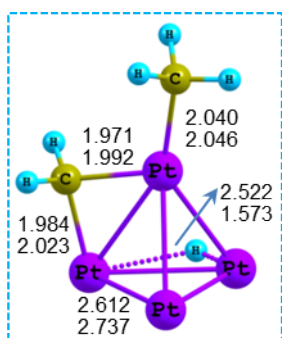

<sup>13</sup>-TS6

|    |             |             |             |
|----|-------------|-------------|-------------|
| Pt | 1.56139200  | -0.18994200 | -0.01506400 |
| Pt | -0.73378600 | -0.07409900 | 1.48954200  |
| Pt | -0.82128700 | -1.32062000 | -0.83596300 |
| Pt | -0.56720900 | 1.48397700  | -0.59989400 |
| C  | 3.51454100  | -0.66344600 | 0.33641200  |
| H  | 3.52097900  | -1.71621100 | 0.67086000  |
| H  | 3.94832400  | -0.03200600 | 1.12478300  |
| C  | 1.40031400  | 1.71571500  | -0.49007600 |
| H  | -0.83578600 | -0.49090000 | -2.14480300 |
| H  | 1.68677300  | 2.39942000  | 0.32607700  |
| H  | 1.83413700  | 1.95016400  | -1.48011200 |
| H  | 4.10587500  | -0.57074700 | -0.58726500 |

<sup>33</sup>-TS6

|    |             |             |             |
|----|-------------|-------------|-------------|
| Pt | 1.47443100  | -0.41144000 | 0.06448300  |
| Pt | -0.97087700 | -0.55122200 | 1.27662600  |
| Pt | -0.86301400 | -0.77262800 | -1.24254300 |
| Pt | -0.22597600 | 1.70389900  | -0.08375900 |
| C  | 3.31629500  | -1.29313200 | 0.19001500  |
| H  | 3.14828100  | -2.37940300 | 0.28097200  |
| H  | 3.85418800  | -0.92927500 | 1.07811000  |
| C  | 1.78891200  | 1.54333500  | -0.15414900 |
| H  | -0.38764000 | 1.49775200  | -1.63505300 |
| H  | 2.24650800  | 2.02692900  | 0.72553700  |
| H  | 2.26038200  | 1.81552800  | -1.10842800 |
| H  | 3.91106100  | -1.08423200 | -0.71124700 |

3-IM8

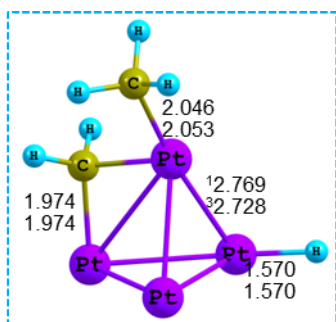

<sup>13</sup>-IM8

|    |             |             |             |
|----|-------------|-------------|-------------|
| Pt | -0.97614500 | 1.47955800  | -0.18124700 |
| Pt | 1.62749700  | -0.05341000 | -0.28073500 |
| Pt | -0.83162400 | -1.14430600 | -0.93471300 |
| Pt | -0.33929200 | -0.49547100 | 1.46363700  |
| C  | 3.57323900  | 0.43376500  | 0.12521700  |
| H  | 4.04871500  | -0.44557200 | 0.59173800  |
| H  | 3.66243700  | 1.29609600  | 0.80027200  |
| C  | 0.91964100  | 1.78428100  | -0.64024800 |
| H  | 1.37906600  | 2.55855800  | -0.00497300 |
| H  | -0.63902800 | -2.70176900 | -0.96972800 |
| H  | 1.03215800  | 1.98662900  | -1.72329800 |
| H  | 4.08540300  | 0.66074400  | -0.82529500 |

<sup>33</sup>-IM8

|    |             |             |             |
|----|-------------|-------------|-------------|
| Pt | -1.14151400 | 1.33574400  | -0.39114500 |
| Pt | 1.62414100  | 0.00320800  | -0.28952700 |
| Pt | -0.69145300 | -1.36781900 | -0.73771500 |
| Pt | -0.28245300 | -0.21819100 | 1.52392300  |
| C  | 3.47685400  | 0.82303400  | 0.04069000  |
| H  | 4.03761100  | 0.14075300  | 0.70137800  |
| H  | 3.43548000  | 1.81931900  | 0.50152000  |
| C  | 0.72369500  | 1.67945200  | -0.93680900 |
| H  | 1.13186500  | 2.58847500  | -0.46827600 |
| H  | -0.28137600 | -2.87882500 | -0.61753300 |
| H  | 0.79504000  | 1.68944500  | -2.04222500 |
| H  | 3.99788800  | 0.89651800  | -0.92997800 |

3-TS7

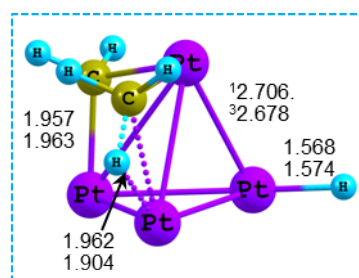

<sup>13</sup>-TS7

|    |             |             |             |
|----|-------------|-------------|-------------|
| Pt | -1.53579400 | -0.36243800 | -0.91641100 |
| Pt | 1.65727300  | -0.46793800 | -0.55610300 |
| Pt | -0.18877700 | -0.80740900 | 1.39251700  |
| Pt | -0.20154800 | 1.55089800  | 0.31915200  |
| C  | 2.06249300  | 1.53342500  | -0.63664300 |
| H  | 3.13675800  | 1.52333600  | -0.36156000 |
| H  | 1.62551100  | 2.24880800  | 0.16484900  |
| C  | 0.12437700  | -0.85944200 | -1.82463300 |
| H  | 0.26043300  | -0.30621600 | -2.76912200 |
| H  | 0.72955500  | -0.73092800 | 2.66058900  |
| H  | 0.17927100  | -1.96333800 | -1.94547100 |

|                    |             |             |             |
|--------------------|-------------|-------------|-------------|
| H                  | 1.91721400  | 1.96161100  | -1.63570900 |
| <sup>33</sup> -TS7 |             |             |             |
| Pt                 | -1.07167200 | 1.49525900  | -0.48981200 |
| Pt                 | 1.67474600  | 0.08123800  | -0.10868100 |
| Pt                 | -0.62175400 | -1.20702200 | -0.59531900 |
| Pt                 | -0.48828800 | 0.11589100  | 1.67050300  |
| C                  | 1.73593300  | 0.77750100  | 1.87937900  |
| H                  | 2.52514500  | 0.13465800  | 2.30261600  |
| H                  | 0.93670000  | 0.79175700  | 2.73693200  |
| C                  | 0.81509200  | 1.67574400  | -1.00239000 |
| H                  | 1.26481500  | 2.61789600  | -0.64558700 |
| H                  | -0.27215000 | -2.73306300 | -0.42948100 |
| H                  | 0.92891300  | 1.51531200  | -2.09329300 |
| H                  | 2.04878000  | 1.82870200  | 1.82906000  |

3-IM9

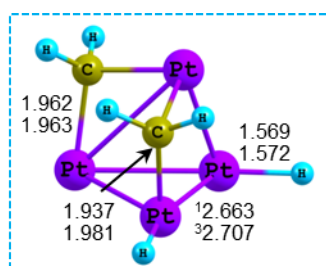<sup>13</sup>-IM9

|    |             |             |             |
|----|-------------|-------------|-------------|
| Pt | -1.07204400 | 1.57378100  | -0.65046200 |
| Pt | 1.79382400  | 0.25498700  | -0.21615400 |
| Pt | -0.55785800 | -1.07032000 | -0.40058900 |
| Pt | -0.53651800 | 0.51553300  | 1.77982900  |
| C  | 1.42576900  | 0.61521600  | 1.71620800  |
| H  | 1.91774400  | -0.20848400 | 2.26316400  |
| H  | -0.50689900 | -0.15224900 | 3.21116800  |
| C  | 0.79358200  | 1.72464800  | -1.18489600 |
| H  | 1.24446700  | 2.70128000  | -0.93609200 |
| H  | -0.16768100 | -2.52475400 | 0.04064900  |
| H  | 0.89703900  | 1.44687900  | -2.25521900 |
| H  | 1.76090000  | 1.62798000  | 2.00629600  |

<sup>33</sup>-IM9

|    |             |             |             |
|----|-------------|-------------|-------------|
| Pt | -1.18898300 | -1.21433700 | -0.49826000 |
| Pt | 1.73545200  | -0.05569900 | -0.61446300 |
| Pt | 0.24019000  | -0.18920400 | 1.60994500  |
| Pt | -0.92519900 | 1.41360400  | -0.23414200 |
| C  | 0.78229500  | 1.60334100  | -1.21951000 |
| H  | 1.33063100  | 2.45208900  | -0.76359600 |
| H  | -1.72460300 | 2.22984300  | -1.32643100 |
| C  | 0.55301500  | -1.52405000 | -1.34833000 |
| H  | 0.51321700  | -1.48663500 | -2.44957800 |

|   |            |             |             |
|---|------------|-------------|-------------|
| H | 0.98251200 | 0.67704700  | 2.69079100  |
| H | 1.00171400 | -2.45752000 | -0.95226400 |
| H | 0.69079600 | 1.66906900  | -2.31206000 |

3-TS8

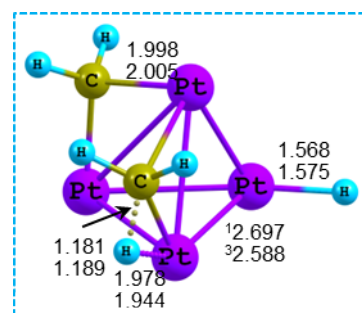<sup>13</sup>-TS8

|    |             |             |             |
|----|-------------|-------------|-------------|
| Pt | -1.55887700 | -0.63403300 | -0.67083300 |
| Pt | 1.59894700  | -0.34222700 | -0.72460400 |
| Pt | 0.17514500  | -0.72294800 | 1.42800500  |
| Pt | -0.40753200 | 1.59583000  | 0.17942900  |
| C  | 1.39040900  | 2.03066600  | -0.57236800 |
| H  | 2.35500800  | 1.87638900  | -0.05098700 |
| H  | 0.97087900  | 2.99712100  | -0.03789200 |
| C  | 0.05573700  | -1.23734800 | -1.62349900 |
| H  | 0.04046900  | -0.94629400 | -2.69070100 |
| H  | 1.30323900  | -0.56019600 | 2.50555100  |
| H  | 0.14028000  | -2.33007000 | -1.44793200 |
| H  | 1.51394900  | 2.26659400  | -1.63852200 |

<sup>33</sup>-TS8

|    |             |             |             |
|----|-------------|-------------|-------------|
| Pt | 1.46576700  | -0.46684700 | -0.90011700 |
| Pt | -1.59126600 | -0.01715000 | -0.74602700 |
| Pt | 0.23893100  | 1.57971600  | 0.43799300  |
| Pt | 0.08269700  | -0.83898400 | 1.34420300  |
| C  | -1.46793700 | -1.95886600 | 0.57780600  |
| H  | -2.48988300 | -1.86146800 | 0.97066900  |
| H  | -0.87216700 | -2.52936200 | 1.43480000  |
| C  | -0.13363400 | -0.45653800 | -2.05042700 |
| H  | -0.31210100 | -1.43618900 | -2.52933500 |
| H  | -0.54371400 | 2.56571900  | 1.38471000  |
| H  | -0.06594800 | 0.38315500  | -2.77024000 |
| H  | -1.40478400 | -2.65470300 | -0.26696000 |

3-IM10

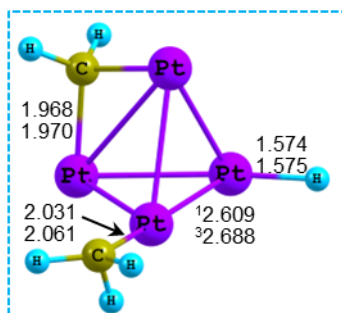

<sup>1</sup>3-IM10

|    |             |             |             |
|----|-------------|-------------|-------------|
| Pt | 1.30506100  | -0.70069900 | -0.83743300 |
| Pt | -1.57034000 | 0.37158800  | -0.50076900 |
| Pt | 0.46292300  | 1.67417100  | 0.26647700  |
| Pt | 0.11368600  | -0.78030000 | 1.42916100  |
| C  | -0.05179600 | -2.69029000 | 2.07524900  |
| H  | -0.68757300 | -3.31506500 | 1.43234300  |
| H  | -0.53483400 | -2.59047800 | 3.07069300  |
| C  | -0.39150400 | -0.49931800 | -1.83349200 |
| H  | -0.83829100 | -1.47203500 | -2.11631500 |
| H  | -0.24132500 | 2.83816700  | 1.03632400  |
| H  | -0.19956000 | 0.17491200  | -2.69166800 |
| H  | 0.93566800  | -3.16467400 | 2.18641700  |

<sup>3</sup>3-IM10

|    |             |             |             |
|----|-------------|-------------|-------------|
| Pt | -0.62859600 | 1.52753700  | 0.61976000  |
| Pt | 0.81390500  | -1.20197600 | 0.91021100  |
| Pt | 1.30726800  | 0.47172100  | -0.98623700 |
| Pt | -1.18227000 | -0.65859500 | -0.70228800 |
| C  | -3.02004600 | -1.45437300 | -0.33056000 |
| H  | -3.01310200 | -2.50073400 | -0.68466000 |
| H  | -3.75781900 | -0.87309900 | -0.91258200 |
| C  | 0.20182700  | 0.37038200  | 1.99237100  |
| H  | -0.55077500 | 0.03370000  | 2.72760300  |
| H  | 2.23429500  | -0.39858100 | -1.89486100 |
| H  | 1.09285600  | 0.85656200  | 2.43026800  |
| H  | -3.30014200 | -1.43152900 | 0.73067300  |

3-TS9

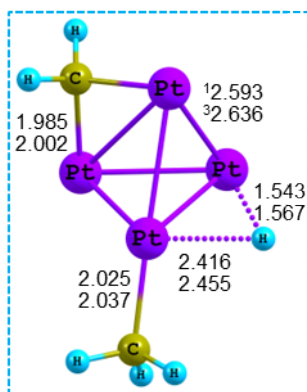

<sup>1</sup>3-TS9

|    |             |             |             |
|----|-------------|-------------|-------------|
| Pt | -1.39703300 | -0.08682300 | -1.11659800 |
| Pt | 0.88585800  | 1.46393800  | 0.21426500  |
| Pt | 1.14397800  | -0.97625800 | -0.39511500 |
| Pt | -0.94789000 | -0.36810300 | 1.42184800  |
| C  | 3.04084000  | -1.56127000 | 0.00519500  |
| H  | 3.78151200  | -0.94164200 | -0.52213700 |
| H  | 3.07408200  | -2.59704700 | -0.39639000 |
| C  | -0.40583900 | 1.60944400  | -1.28569300 |
| H  | -1.03612800 | 2.50759200  | -1.13526700 |
| H  | -0.45361900 | -1.81464600 | 1.21163100  |
| H  | 0.12791900  | 1.59011500  | -2.25708700 |
| H  | 3.27296100  | -1.58821200 | 1.07901900  |

<sup>3</sup>3-TS9

|    |             |             |             |
|----|-------------|-------------|-------------|
| Pt | -1.50874300 | -0.68686400 | -0.70234100 |
| Pt | 0.42713600  | 1.61931900  | -0.37939400 |
| Pt | 1.21871900  | -0.91399800 | -0.36317100 |
| Pt | -0.40175300 | 0.00536600  | 1.58770600  |
| C  | 3.22401700  | -1.13083200 | -0.08153700 |
| H  | 3.72490400  | -0.88036700 | -1.03312200 |
| H  | 3.41135700  | -2.18812600 | 0.17803900  |
| C  | -1.18732500 | 1.12334600  | -1.45348300 |
| H  | -2.02676100 | 1.81650400  | -1.27176900 |
| H  | 0.60993600  | -1.11549300 | 2.00654700  |
| H  | -0.92220500 | 1.04559700  | -2.52468500 |
| H  | 3.62464900  | -0.49143900 | 0.71669600  |

3-IM11

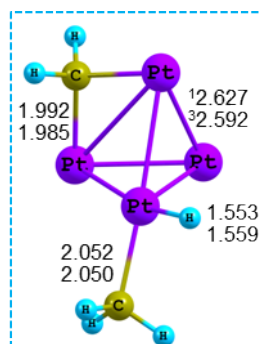

<sup>1</sup>3-IM11

|    |             |             |             |
|----|-------------|-------------|-------------|
| Pt | -1.14543600 | -0.81822300 | -0.95333100 |
| Pt | 0.28532800  | 1.66113700  | 0.19875200  |
| Pt | 1.06949100  | -1.00635700 | 0.48041600  |
| Pt | -1.22222200 | 0.10343600  | 1.53493000  |
| C  | 2.86200900  | -1.40493300 | -0.43285800 |
| H  | 2.88689900  | -2.37724200 | -0.94194100 |
| H  | 3.63040400  | -1.39963500 | 0.36090600  |
| C  | -0.64111300 | 1.03652400  | -1.43550000 |

|   |             |             |             |
|---|-------------|-------------|-------------|
| H | -1.55135000 | 1.62473300  | -1.65122800 |
| H | 1.13821200  | -2.51921500 | 0.83339000  |
| H | 0.09328900  | 1.02809100  | -2.26695900 |
| H | 3.06772500  | -0.60042800 | -1.15501300 |

<sup>33</sup>-IM11

|    |             |             |             |
|----|-------------|-------------|-------------|
| Pt | -1.63069500 | -0.61500600 | -0.54684000 |
| Pt | 0.61061600  | 1.59537200  | -0.52907300 |
| Pt | 1.05147400  | -1.15116300 | -0.25214600 |
| Pt | -0.29921000 | 0.25475100  | 1.49937500  |
| C  | 3.07967600  | -1.40253100 | -0.08663700 |
| H  | 3.41171200  | -1.89642200 | -1.01718600 |
| H  | 3.35982500  | -2.02994800 | 0.76923400  |
| C  | -1.04996900 | 1.04405600  | -1.46593200 |
| H  | -1.82076200 | 1.83041800  | -1.37861000 |
| H  | 0.98938300  | -2.66984600 | 0.09432000  |
| H  | -0.78637100 | 0.78349900  | -2.51194200 |
| H  | 3.55755800  | -0.41529400 | -0.00300000 |

3-TS10

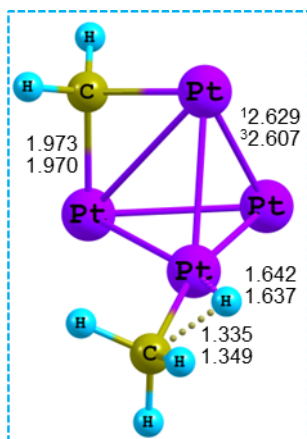

<sup>13</sup>-TS10

|    |             |             |             |
|----|-------------|-------------|-------------|
| Pt | -1.44130900 | -0.62588700 | 0.21581700  |
| Pt | -0.26747700 | 1.59386200  | -0.62294500 |
| Pt | 1.26211500  | -1.09807100 | -0.72904700 |
| Pt | 0.77193600  | 0.25447800  | 1.38675700  |
| C  | 1.02413700  | 0.57736900  | -1.74376700 |
| H  | -3.07310000 | -0.47685600 | 0.32669400  |
| H  | 1.97321200  | 1.13678900  | -1.83100700 |
| C  | -3.36179200 | -1.49883400 | -0.48178700 |
| H  | -4.41166100 | -1.18015600 | -0.37530100 |
| H  | -3.26634100 | -2.50275600 | -0.04851200 |
| H  | -3.11314700 | -1.48239400 | -1.54894000 |
| H  | 0.54632100  | 0.33242400  | -2.71503200 |

<sup>33</sup>-TS10

|    |             |             |             |
|----|-------------|-------------|-------------|
| Pt | -1.46851100 | -0.56109900 | 0.16203100  |
| Pt | -0.16457400 | 1.59535500  | -0.65322900 |

|    |             |             |             |
|----|-------------|-------------|-------------|
| Pt | 1.24304000  | -1.16452500 | -0.67218200 |
| Pt | 0.70742100  | 0.25912600  | 1.40793500  |
| C  | 1.12377300  | 0.50232100  | -1.71504000 |
| H  | -3.09068300 | -0.35182000 | 0.22851400  |
| H  | 2.10200900  | 1.01469000  | -1.76056500 |
| C  | -3.38555200 | -1.47703400 | -0.45547600 |
| H  | -4.43091800 | -1.13361900 | -0.39645900 |
| H  | -3.30594400 | -2.42443700 | 0.09387900  |
| H  | -3.12741100 | -1.59243800 | -1.51484800 |
| H  | 0.66834300  | 0.28505300  | -2.70270700 |

3-IM12

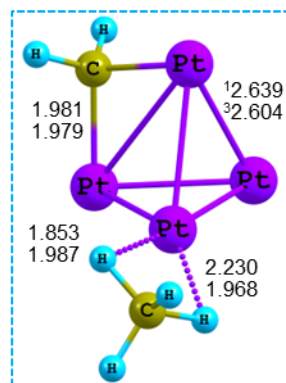

<sup>13</sup>-IM12

|    |             |             |             |
|----|-------------|-------------|-------------|
| Pt | -0.55317000 | -1.53350200 | -0.69573800 |
| Pt | -0.55230000 | 1.53384000  | -0.69564200 |
| Pt | 1.51244600  | -0.00046900 | 0.20103600  |
| Pt | -0.76271100 | 0.00015800  | 1.44192000  |
| C  | 3.80350100  | -0.00053900 | -0.43417300 |
| H  | 2.84167400  | -0.00078800 | -1.08948800 |
| H  | 3.69241000  | 0.00035400  | 0.67188600  |
| C  | -1.20815800 | 0.00038900  | -1.76373900 |
| H  | -2.31421800 | 0.00069400  | -1.79781300 |
| H  | 4.33882400  | 0.90734500  | -0.73089700 |
| H  | -0.72204800 | 0.00028300  | -2.75966100 |
| H  | 4.33862000  | -0.90897600 | -0.72955200 |

<sup>33</sup>-IM12

|    |             |             |             |
|----|-------------|-------------|-------------|
| Pt | 0.66074800  | 1.52553900  | -0.61967400 |
| Pt | 0.66479100  | -1.52396000 | -0.62007500 |
| Pt | -1.55805200 | -0.00148800 | -0.01857700 |
| Pt | 0.55623200  | 0.00027900  | 1.48814100  |
| C  | -3.82813900 | -0.00463400 | -0.47477400 |
| H  | -3.06127600 | -0.00257800 | -1.31859900 |
| H  | -3.42756300 | -0.00441400 | 0.59469000  |
| C  | 1.53128600  | 0.00198700  | -1.53523300 |
| H  | 2.62082800  | 0.00357500  | -1.34625000 |
| H  | -4.42296200 | -0.91574700 | -0.59429900 |

|   |             |            |             |
|---|-------------|------------|-------------|
| H | 1.24832200  | 0.00173000 | -2.60795100 |
| H | -4.42634800 | 0.90442900 | -0.59309100 |

3-TS11

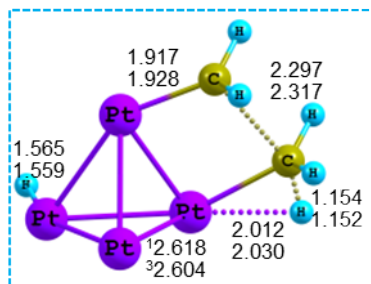

<sup>13</sup>3-TS11

|    |             |             |             |
|----|-------------|-------------|-------------|
| Pt | 0.76811200  | -0.55023000 | 1.22490200  |
| Pt | 0.55380200  | 1.24312300  | -0.59940100 |
| Pt | -1.67025700 | 0.41643300  | 0.48007300  |
| Pt | -0.22870200 | -1.20232700 | -1.11276500 |
| C  | 2.67814900  | 1.09434300  | -0.75481500 |
| H  | 2.23227400  | 1.77926400  | -1.56973200 |
| H  | 3.22527000  | 0.35883500  | -1.34865000 |
| C  | 2.64474400  | -0.56404100 | 0.83429100  |
| H  | 3.10214200  | -1.27638900 | 0.14204700  |
| H  | -2.13913900 | 1.53242900  | 1.47184400  |
| H  | 3.34555200  | -0.04787000 | 1.50769100  |
| H  | 3.30616400  | 1.72595900  | -0.11914300 |

<sup>33</sup>3-TS11

|    |             |             |             |
|----|-------------|-------------|-------------|
| Pt | 0.72887200  | -0.61443900 | 1.19035000  |
| Pt | 0.56496100  | 1.27337700  | -0.51528100 |
| Pt | -1.71504600 | 0.37962700  | 0.44939100  |
| Pt | -0.15854300 | -1.14386600 | -1.16027700 |
| C  | 2.70745300  | 1.18794800  | -0.60322000 |
| H  | 2.28410800  | 1.95562900  | -1.35080400 |
| H  | 3.27418100  | 0.50348200  | -1.23780600 |
| C  | 2.63671800  | -0.55568200 | 0.92115200  |
| H  | 3.16193600  | -1.22061400 | 0.23020300  |
| H  | -2.15440700 | 1.43623800  | 1.50849200  |
| H  | 3.27364800  | -0.01672000 | 1.63553600  |
| H  | 3.31646900  | 1.76184200  | 0.10055400  |

3-IM13

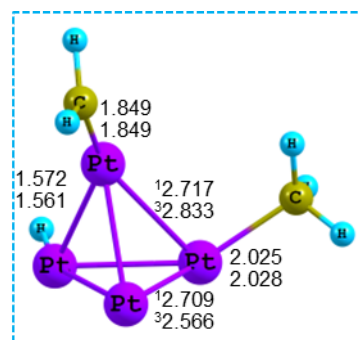

<sup>13</sup>3-IM13

|    |             |             |             |
|----|-------------|-------------|-------------|
| Pt | 1.10029300  | 0.99866300  | 0.49590200  |
| Pt | -1.27576400 | 0.54705700  | -0.74149200 |
| Pt | -0.69422200 | -0.91384100 | 1.17873500  |
| Pt | 0.92606900  | -1.01533300 | -0.97005200 |
| C  | -2.84269600 | 1.77787900  | -0.38223400 |
| H  | -2.82524500 | 2.46825300  | -1.25396400 |
| H  | -2.74001100 | 2.36304500  | 0.54065600  |
| C  | 2.83376200  | 1.64166800  | 0.48900700  |
| H  | 3.69628000  | 1.24861700  | -0.06044800 |
| H  | -1.71963900 | -0.44183300 | 2.27211900  |
| H  | 3.03629500  | 2.53436000  | 1.11207800  |
| H  | -3.79130600 | 1.21971100  | -0.37228800 |

<sup>33</sup>3-IM13

|    |             |             |             |
|----|-------------|-------------|-------------|
| Pt | 1.33565100  | -0.23790600 | -0.80434300 |
| Pt | -1.43157200 | -0.62905700 | -0.34000100 |
| Pt | -0.34469900 | 1.68166100  | -0.07017500 |
| Pt | 0.33419300  | -0.49530200 | 1.51764200  |
| C  | -1.81389600 | -2.18375000 | -1.58511400 |
| H  | -2.26489100 | -2.97375400 | -0.95961400 |
| H  | -0.92245500 | -2.56273700 | -2.09684000 |
| C  | 3.08237100  | -0.83512700 | -0.91353600 |
| H  | 3.74176800  | -1.11315400 | -0.08247900 |
| H  | -0.87426500 | 2.49921100  | -1.29007300 |
| H  | 3.56378100  | -0.84468300 | -1.90956000 |
| H  | -2.55353400 | -1.80446400 | -2.31307200 |

3-TS12

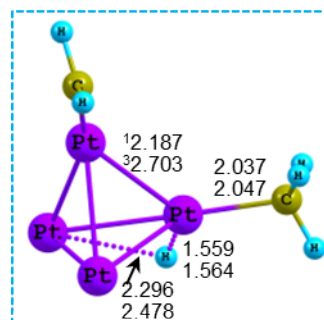

<sup>13</sup>3-TS12

|    |             |             |             |
|----|-------------|-------------|-------------|
| Pt | -0.42165000 | 1.37940400  | -0.51573000 |
| Pt | 1.64725900  | -0.17840600 | 0.19856100  |
| Pt | -0.59335900 | -1.23031200 | -0.99627900 |
| Pt | -0.95916700 | -0.35088500 | 1.29777500  |
| C  | 3.56451200  | 0.50819600  | 0.23414700  |
| H  | 4.21696000  | -0.28809200 | 0.62990400  |
| H  | 3.60636600  | 1.38793900  | 0.89964300  |
| C  | -1.13338100 | 3.05458200  | -0.17178800 |
| H  | -1.52050400 | 3.44152700  | 0.77821300  |
| H  | 1.70123400  | -1.25467400 | -0.92842800 |
| H  | -1.23705100 | 3.73813600  | -1.03596500 |
| H  | 3.90664000  | 0.79724600  | -0.76994100 |

<sup>33</sup>-TS12

|    |             |             |             |
|----|-------------|-------------|-------------|
| Pt | -0.93999900 | 1.22335900  | -0.35125400 |
| Pt | 1.56476900  | 0.21212400  | -0.24649000 |
| Pt | -0.55968400 | -1.33478300 | -0.90336100 |
| Pt | -0.27936500 | -0.53857900 | 1.48494300  |
| C  | 3.27009300  | 1.30512300  | 0.04806700  |
| H  | 4.01044700  | 0.72588900  | 0.61787400  |
| H  | 3.02310300  | 2.23409700  | 0.58632600  |
| C  | -1.85549000 | 2.75620200  | 0.16051400  |
| H  | -2.06875000 | 3.05897700  | 1.19482900  |
| H  | 1.91314400  | -1.19131300 | -0.84230300 |
| H  | -2.33003400 | 3.39869700  | -0.60261300 |
| H  | 3.67827800  | 1.56022600  | -0.94495100 |

3-IM14

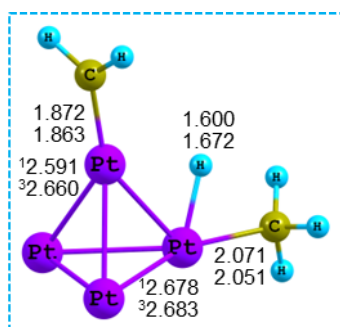

<sup>13</sup>-IM14

|    |             |             |             |
|----|-------------|-------------|-------------|
| Pt | -1.33451700 | 0.79796300  | -0.51020300 |
| Pt | 1.54445700  | 0.75507500  | 0.14007700  |
| Pt | 0.29531100  | -1.33358000 | -0.94471000 |
| Pt | -0.50096300 | -0.73219000 | 1.31109600  |
| C  | 2.88846100  | 2.04395100  | 0.09956400  |
| H  | 0.21776300  | 1.66593000  | -0.30381600 |
| H  | 3.90300500  | 1.82486900  | 0.47515900  |
| C  | -2.64940900 | 2.26289000  | -0.02252100 |
| H  | -2.23863300 | 3.05125300  | 0.62114000  |

|   |             |            |             |
|---|-------------|------------|-------------|
| H | -3.58081000 | 1.86539600 | 0.40579200  |
| H | -2.86353600 | 2.69863500 | -1.02605600 |
| H | 2.79341800  | 3.04597400 | -0.34279800 |

<sup>33</sup>-IM14

|    |             |             |             |
|----|-------------|-------------|-------------|
| Pt | -1.52936000 | 0.45934900  | -0.29570900 |
| Pt | 1.17905400  | 1.07408300  | -0.21699300 |
| Pt | 0.36602600  | -1.31276100 | -0.97764700 |
| Pt | 0.08235400  | -0.68441500 | 1.45122600  |
| C  | 2.58262200  | 2.20365700  | 0.25639000  |
| H  | -0.50290400 | 1.77768900  | -0.22790000 |
| H  | 2.99553800  | 2.30146500  | 1.27001900  |
| C  | -3.09972800 | 1.71943000  | 0.09351700  |
| H  | -2.86632100 | 2.51885600  | 0.80833300  |
| H  | -3.92931800 | 1.10549800  | 0.48256600  |
| H  | -3.39570200 | 2.17650300  | -0.86796800 |
| H  | 3.15153200  | 2.75354400  | -0.51290300 |

3-TS13

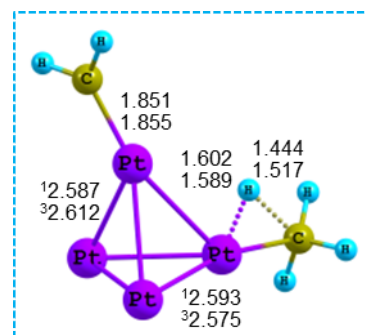

<sup>13</sup>-TS13

|    |             |             |             |
|----|-------------|-------------|-------------|
| Pt | -1.60619700 | 0.25569300  | 0.09532600  |
| Pt | 0.91348300  | 1.22956700  | -0.42101200 |
| Pt | 0.15809500  | -1.26590100 | -1.04370400 |
| Pt | 0.70567700  | -0.67668500 | 1.31577800  |
| C  | 2.31693000  | 2.39956300  | -0.12417500 |
| H  | -2.16627400 | 1.19321100  | 1.26798100  |
| H  | 3.01631900  | 2.39012800  | 0.72162000  |
| C  | -3.29640600 | 1.54487300  | 0.44158400  |
| H  | -3.36411100 | 2.42409300  | 1.10085000  |
| H  | -4.14392100 | 0.87897000  | 0.64700400  |
| H  | -3.30731500 | 1.91865100  | -0.59437700 |
| H  | 2.49962200  | 3.19975600  | -0.86581800 |

<sup>33</sup>-TS13

|    |             |             |             |
|----|-------------|-------------|-------------|
| Pt | 1.47293400  | -0.57022400 | -0.24162800 |
| Pt | -1.32470600 | -0.87596700 | -0.42568000 |
| Pt | -0.02988000 | 1.43127900  | -0.84681000 |
| Pt | -0.19871700 | 0.47166500  | 1.50746700  |
| C  | -2.86755600 | -1.85071400 | -0.09254600 |
| H  | 1.56987300  | -2.12468400 | 0.07409100  |



|   |             |             |             |
|---|-------------|-------------|-------------|
| H | -3.36455200 | -1.95942700 | 0.88148400  |
| C | 3.07741900  | -1.96253000 | 0.10429000  |
| H | 3.01817500  | -3.00390700 | 0.45481900  |
| H | 3.64580700  | -1.38711000 | 0.84689300  |
| H | 3.56752700  | -1.96323600 | -0.88076500 |
| H | -3.42727500 | -2.30884200 | -0.92824200 |

3-IM15

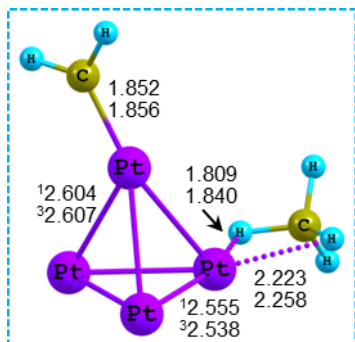

<sup>13</sup>3-IM15

|    |             |             |             |
|----|-------------|-------------|-------------|
| Pt | -1.57506700 | 0.26263900  | 0.02265400  |
| Pt | 0.95548800  | 1.21498900  | -0.41572100 |
| Pt | 0.16621700  | -1.28966200 | -1.02037400 |
| Pt | 0.61987500  | -0.66426900 | 1.35579400  |

|   |             |            |             |
|---|-------------|------------|-------------|
| C | 2.35633400  | 2.38808600 | -0.11578400 |
| H | -2.45426700 | 1.31892200 | 1.19847300  |
| H | 3.04206100  | 2.38350100 | 0.74172100  |
| C | -3.28489900 | 1.77680400 | 0.50068600  |
| H | -3.14219800 | 2.85443600 | 0.63254800  |
| H | -4.23078800 | 1.42733200 | 0.92716100  |
| H | -3.27301700 | 1.55981800 | -0.58889100 |
| H | 2.54811600  | 3.19100200 | -0.85190900 |

<sup>33</sup>3-IM15

|    |             |             |             |
|----|-------------|-------------|-------------|
| Pt | -1.47451500 | 0.49030400  | -0.10367100 |
| Pt | 1.22180900  | 0.97046100  | -0.43792000 |
| Pt | 0.00362600  | -1.39912700 | -0.93119100 |
| Pt | 0.33497100  | -0.57552800 | 1.46465000  |
| C  | 2.72998400  | 2.01417700  | -0.15535200 |
| H  | -2.25213700 | 1.79973800  | 0.92806600  |
| H  | 3.30012000  | 2.08886000  | 0.78086500  |
| C  | -2.95654400 | 2.32560900  | 0.16273700  |
| H  | -2.62097400 | 3.36768600  | 0.17384300  |
| H  | -3.95940900 | 2.20711400  | 0.58652600  |
| H  | -2.97278900 | 1.98349300  | -0.89232000 |
| H  | 3.16505900  | 2.59784100  | -0.98698100 |

**Table S4:** IRC analysis of 2-TS3, 2-TS7, 3-TS6 and 3-TS11 for the minimum energy crossing points (MECPs).

1. IRC analysis for  $^12\text{-TS3} \rightarrow ^12\text{-IM2}$  and  $^32\text{-TS3} \rightarrow ^32\text{-IM2}$ .

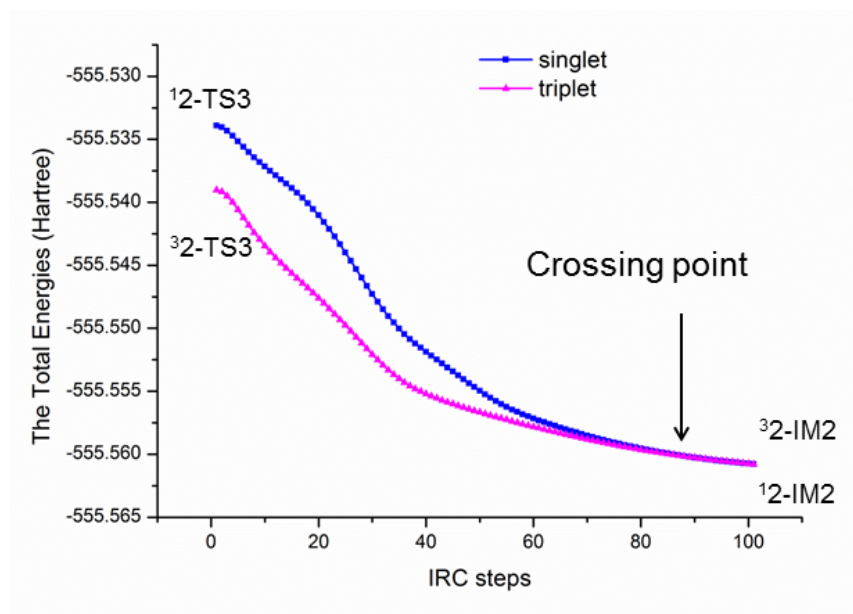

2. IRC analysis for  $^12\text{-TS7} \rightarrow ^12\text{-IM7}$  and  $^32\text{-TS7} \rightarrow ^32\text{-IM7}$ .

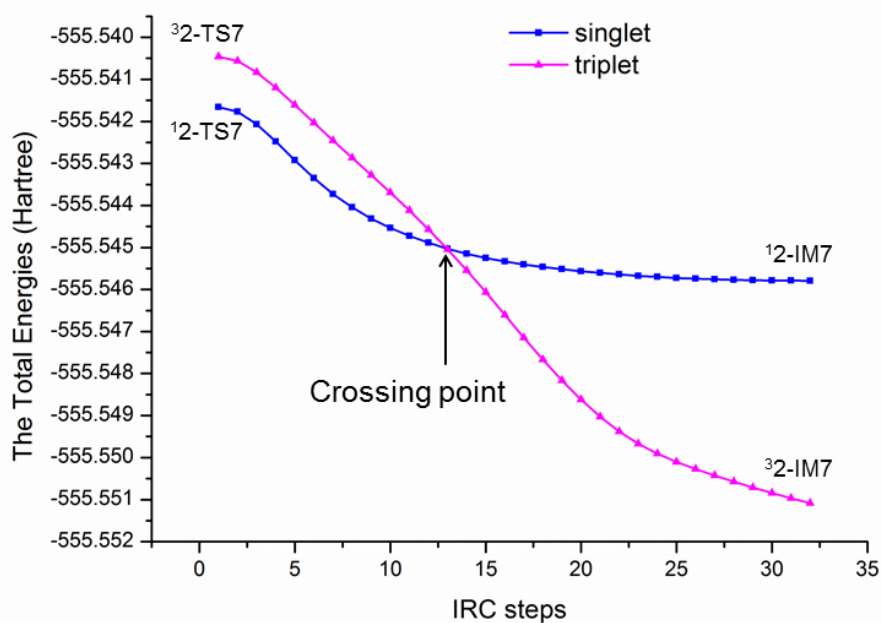

3. IRC analysis for  ${}^1_2\text{-TS7} \rightarrow {}^1_2\text{-IM8}$  and  ${}^3_2\text{-TS7} \rightarrow {}^3_2\text{-IM8}$ .

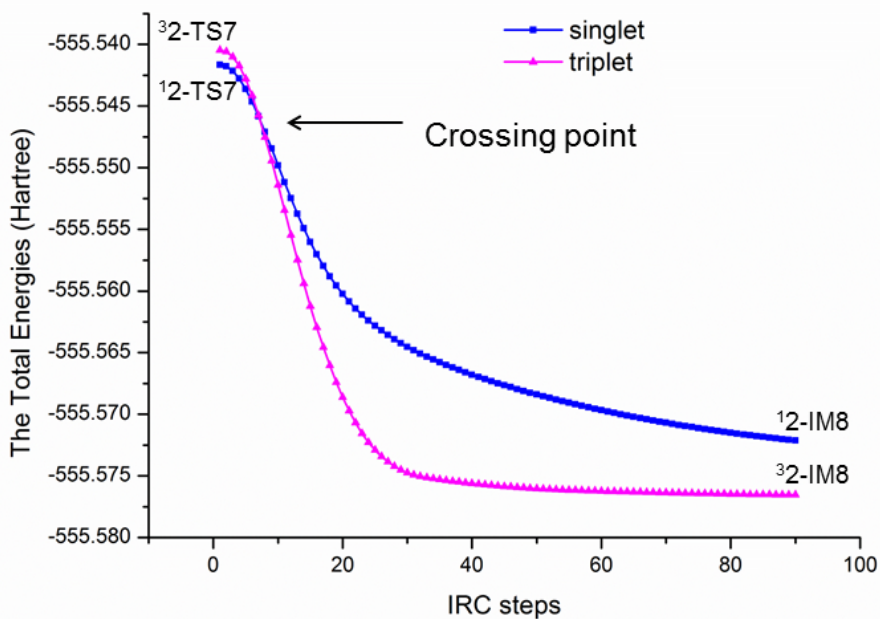

4. IRC analysis for  ${}^1_3\text{-TS6} \rightarrow {}^1_3\text{-IM7}$  and  ${}^3_3\text{-TS6} \rightarrow {}^3_2\text{-IM7}$ .

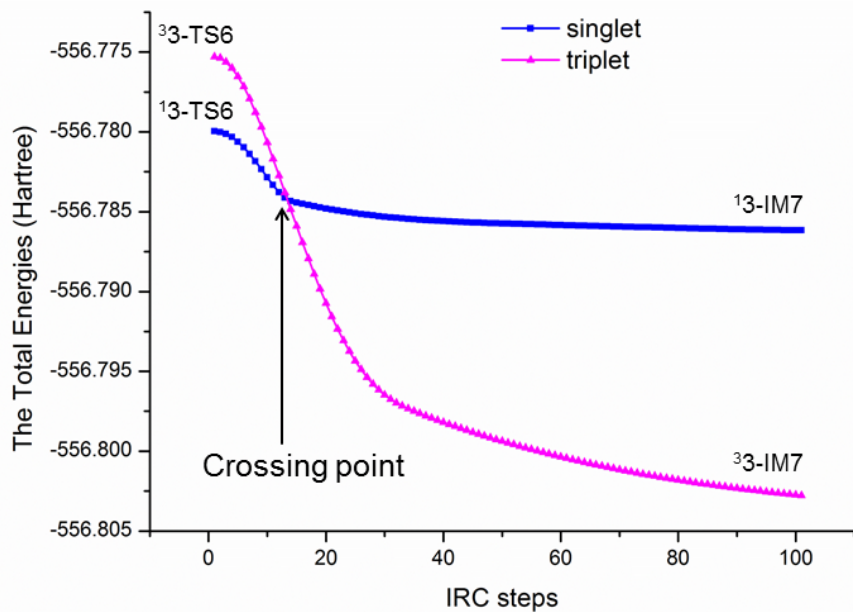

5. IRC analysis for  $^1\text{3-TS11} \rightarrow ^1\text{3-IM13}$  and  $^3\text{3-TS11} \rightarrow ^3\text{3-IM13}$ .

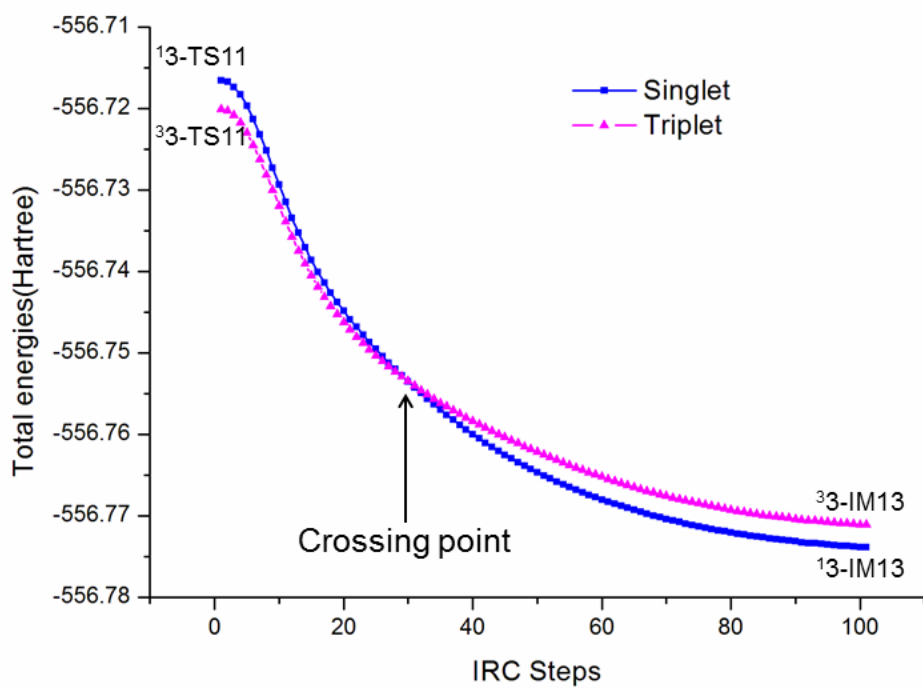

Supplement: c5ra06550j1.pdf [file c5ra06550j1.pdf]
